1 **Value computations underlying human proposer behaviour in the Ultimatum Game**

2 **Erdem Pulcu<sup>1,2\*</sup>, Masahiko Haruno<sup>1\*</sup>**

3

4 <sup>1</sup> **Center for Information and Neural Networks / National Institute of Information and Communications**  
5 **Technology; Suita, Osaka, 565-0871, JAPAN**

6 <sup>2</sup> **University of Oxford, Department of Psychiatry, Computational Psychiatry Lab; Oxford, OX3 7JX, UK**

7 **\*correspondence to: [pulerd@gmail.com](mailto:pulerd@gmail.com) or [mharuno@nict.go.jp](mailto:mharuno@nict.go.jp)**

8

9

10

11

12

13

14

15

16

17

18

19

20

21

22

23

24

25

26

27 **Abstract**

28 **Interacting with others to decide how finite resources should be allocated between parties which may**  
29 **have competing interests is an important part of social life. Considering that not all of our proposals to**  
30 **others are always accepted, the outcomes of such social interactions are, by their nature, probabilistic**  
31 **and risky. Here, we highlight cognitive processes related to value computations in human social**  
32 **interactions, based on mathematical modelling of the proposer behavior in the Ultimatum Game. Our**  
33 **results suggest that the perception of risk is an overarching process across non-social and social**  
34 **decision-making, whereas nonlinear weighting of others' acceptance probabilities is unique to social**  
35 **interactions in which others' valuation processes needs to be inferred. Despite the complexity of**  
36 **social decision-making, human participants make near-optimal decisions by dynamically adjusting**  
37 **their decision parameters to the changing social value orientation of their opponents through**  
38 **influence by multidimensional inferences they make about those opponents (e.g. how prosocial they**  
39 **think their opponent is relative to themselves).**

40

41

42

43

44

45

46

47

48

49

50

51

52 **Authors' Significance Statement**

53 **Humans are capable of developing sophisticated strategies for negotiating how finite resources should**  
54 **be distributed between parties with competing interests. This study describes a cognitive model**  
55 **implementing value computations in risky and uncertain situations, where one's terms may be**  
56 **accepted or rejected depending on how others value them. Surprisingly, despite its everyday and**  
57 **socio-political importance, the evaluation of risk and uncertainty in human social interactions that**  
58 **involve the distribution of monetary resources has not previously been studied using a computational**  
59 **framework. In an ecologically valid experimental design, we provide quantitative evidence to suggest**  
60 **that people make nearly optimal decisions in social interactions, as they would in a non-social value-**  
61 **based decision-making context, and that these decisions are influenced by the human ability to**  
62 **dynamically adjust the decision parameters, particularly those that depend on how the individual**  
63 **represents different dimensions of the opponents' social value orientation.**

64

65

66

67

68

69

70

71

72

73

74

75

76

## 77 Introduction

78 Using the optimal decision-making strategy in non-social and social contexts is a key challenge of our  
79 everyday life, and from a broader perspective it is closely linked to our survival. Social contexts  
80 demanding optimal decision-making also involve negotiating with others over terms which might result  
81 in fair or unfair resource distributions (1-4). A common psychological observation would suggest that the  
82 optimal strategy in such social interactions (such as the Ultimatum Game(1, 3), or the Prisoner's  
83 Dilemma(5)) should consider how others will perceive the extent of our cooperative/competitive  
84 intentions. This is a task that requires simulating others' valuation processes. However, because our  
85 knowledge of other people's state of mind is limited, we might miscalculate their reactions. As a result,  
86 the proposals that we make are not always accepted. In other words, the outcomes of social  
87 interactions which involve the distribution of resources between two parties are inherently probabilistic  
88 and risky. This implies that there should be a degree of overlap between cognitive models which  
89 account for economic decision-making under uncertainty (6) and those which can capture human  
90 behaviour in social interactions. However, there is limited work on computational models of value-based  
91 decision-making in social contexts, and it is not known whether similar approaches are used across non-  
92 social and social situations.

93 Previous theoretical work demonstrated that it is possible to sustain mutual cooperation even when  
94 resources are distributed unfairly between two individuals (7). Using the example of a simple social  
95 economic game (i.e. Prisoner's Dilemma), Press and Dyson demonstrated that in order to sustain mutual  
96 cooperation under unfair conditions, the player who aims to establish favourable terms for himself still  
97 needs to give enough incentive to his opponent. Thus, the player needs to have good understanding of  
98 the opponent's underlying value function to predict at which stage the opponent might change her  
99 strategy and stop cooperating. In this context, human social interactions have an intrinsic element of  
100 risk and uncertainty; one side setting the terms of interpersonal cooperation should consider the other  
101 side's rejection possibility (i.e. proposer behaviour in the Ultimatum Game). Additionally, with any move  
102 that the player makes towards maximising his own payoff by offering conditions that are not in harmony  
103 with the valuation of the opponent, the player risks entering a domain where the opponent's rejection  
104 probability increases. These conditions highlight a social interaction scenario in which a player who is  
105 interested in maximizing his payoff needs to make value-based decisions while incorporating his  
106 opponent's rejection probability (e.g. the Balloon Analogue Task(8) in value-based domains; or the

107 proposer behaviour in the Ultimatum Game(3) in social decision-making domains). However, value  
108 computations in such social interactions have not been studied experimentally or quantitatively.

109 Here, we designed a behavioural experiment to capture these decision-making processes. We focused  
110 on human participants' Ultimatum giving behaviour and used this common behavioural economic  
111 measure as an experimental probe of how humans tackle resource distribution problems. Our primary  
112 aim was to construct a formal cognitive model that can account for how others' valuation processes are  
113 integrated to self-decision values during social decision-making. To do so, we tested the degree to which  
114 participants utilise computational models that integrate outcome probabilities and reward magnitudes  
115 into expected values. In the context of acting as proposers in the Ultimatum Game, expected value  
116 computations would require integrating the inferred acceptance probability of one's opponent with  
117 potential self-reward magnitudes (see Materials and Methods for mathematical definitions). Although  
118 computational models of decision-making under uncertainty are relatively well established (9), it is not  
119 known how well social decision-making models with a comparable structure can account for human  
120 behaviour during social interactions.

121 In order capture the necessary components of a value-based decision-making model experimentally (i.e.  
122 outcome probabilities and reward magnitudes), we asked participants to: (i) learn the underlying value  
123 functions of two distinct computerised agents with different Social Value Orientations (SVOs<sup>1,2</sup>; one  
124 prosocial, the other individualistic; categorically defined with respect to their degree of prosociality) by  
125 observing their Ultimatum acceptance preferences (see Fig. 1 and legends for the experimental design);  
126 and (ii) transfer this information to make value-based decisions between one of two Ultimatum offers to  
127 be given to agents whom they have observed in the learning sessions. Furthermore, in order to test the  
128 prediction that value computations may be modulated differently across non-social and social contexts,  
129 we used a probabilistic value-based risk decision-making paradigm as a control condition (Fig. 1). Our *a*  
130 *priori* prediction was that, unlike a stable preference usually seen in non-social contexts, people exhibit a  
131 dynamic adjustment in social contexts, which allows them to adapt their behavioural strategies to the  
132 changing characteristics of their opponents.

133

134

135

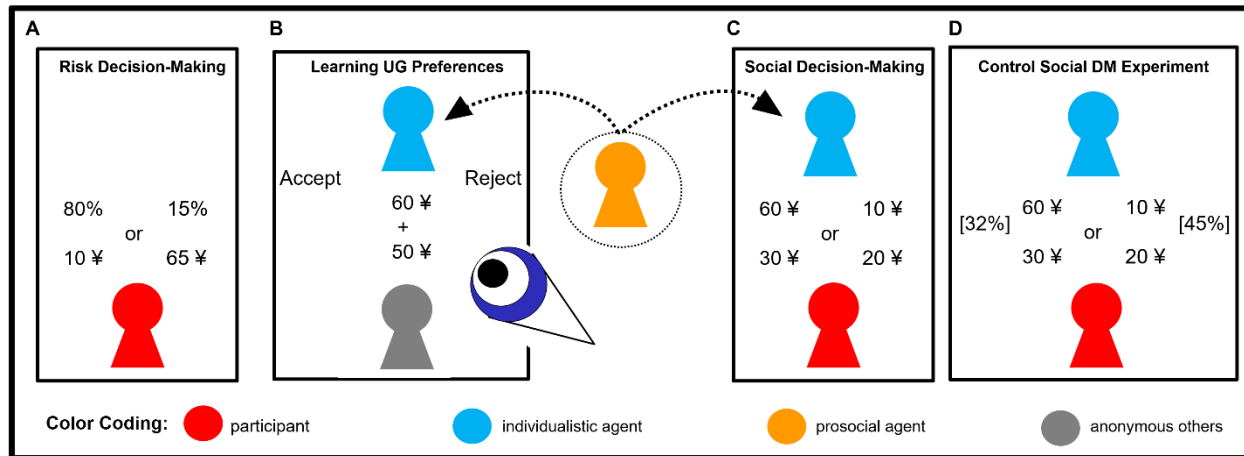

136

137 **Fig. 1. Details of the experimental paradigms.** In total participants completed 700 trials: 100 trials in task A, 360 trials in task B and 240 trials in task C. (A) Outline of the baseline risk decision-making task, where participants' risk perception in a non-social context was evaluated. (B) Participants completed two observational social-learning sessions (represented by the schematic blue eye observing the Ultimatum Game interaction), where they were asked to predict the Ultimatum acceptance preferences of two social agents with different Social Value Orientations (SVO) who were responding to offers coming from different anonymous individuals, blue, individualistic; orange, prosocial agent (colour coding is consistent in all subsequent figures). (C) Following the observational social-learning sessions, participants completed a social decision-making experiment in which they were asked to give Ultimatum offers to those social agents from a binary selection. (D) Outline of the control social decision-making task administered to an independent cohort, in which the social agents' acceptance probabilities (shown inside square brackets) were given explicitly alongside the Ultimatum offers. All tasks were self-paced. UG, Ultimatum Game; DM, decision-making.

148

149

150

151

152

153

154

155

156

157

158

159 **Results**

160 **Social Learning Session.** Participants were able to predict the Ultimatum acceptance preferences of  
161 social agents with different SVOs  $\sim 70\%$  correctly. Prediction accuracy was significantly higher than  
162 random guessing for both social agents (Fig. 2A; t-tests from 0.5; all  $t > 22$ ;  $p < 0.001$ , Bonferroni  
163 corrected). Participants were able to predict the decisions of the prosocial agent significantly more  
164 frequently than the individualistic agent ( $t = -9.94$ ;  $p < 0.001$ ). Participants' prediction accuracy closely  
165 followed the subjective valuation of the social agents: predictive accuracy was low around the  
166 indifference point of the agents' subjective valuations ( $\tilde{v} = 0$ ) and increased whenever the subjective  
167 valuation of the agents was either very negative or positive (Fig. 2B).

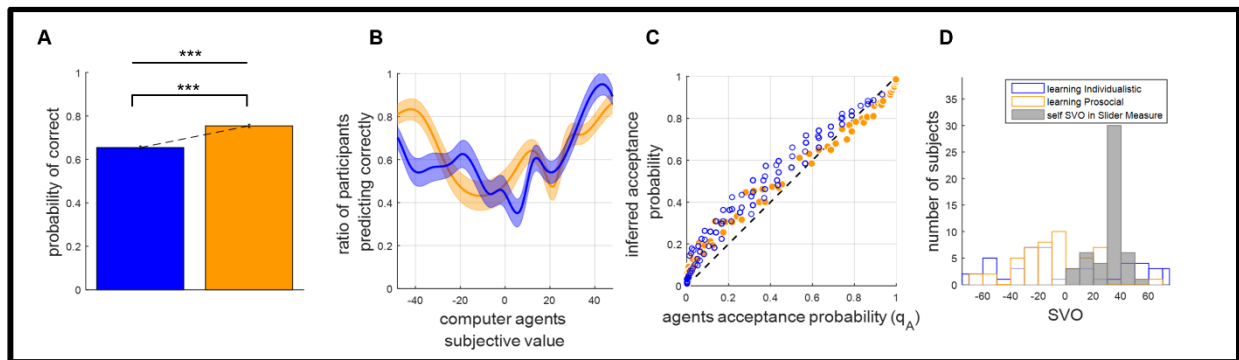

168

169 **Fig. 2. Summary of results from the observational social-learning session.** (A) Participants' prediction accuracy was  
170 significantly higher than random guessing and higher for the prosocial agent relative to the individualistic agent (\*\*\*)  
171 error bars show SEM). (B) Prediction accuracy followed the subjective valuation of the social agents, irrespective of their  
172 SVOs. (C) Encoded value functions were highly and significantly correlated with the social agents' actual value functions  
173 ( $r > .97$ ,  $P < 0.001$ ), and had non-linear properties. (D) Participants SVOs calculated on the basis of their decisions in the  
174 learning sessions had significantly different distributions than their SVOs measured by the Triple Dominance Measure  
175 ( $D > 0.60$ ,  $P < 0.001$ ), suggesting participants actively made decisions which are not in accordance with their SVOs to learn  
176 about these social agents.

177 The decisions of the computerised social agents were generated by a model which was derived from the  
178 SVO framework ((1); also see Materials and Methods). We fitted the same generative model to the  
179 participants' predictions in the learning session to estimate the inference of their opponents' value  
180 function ( $\tilde{q}_A$ ). The encoded value functions estimated from the learning session ( $\tilde{q}_A$ ) correlated highly  
181 and significantly with the agents' actual value functions ( $q_A$ ; all  $r(49) > .97$ , all  $p < 0.001$ , Bonferroni  
182 corrected, see Fig. 2C). This learning model had significantly better fitting relative to a model that has  
183 the same number of parameters but makes random predictions in terms of  $-\log$  likelihood values (t-test  
184 from 0.69; all  $t < -81$ , all  $p < 0.001$ , Bonferroni corrected) for both social agents. The pseudo- $R^2$  values ( $\bar{R}^2$ ;

185 adjusted for the sample size and the number of free parameters(10, 11)) of the model were 0.233 and  
186 0.378 for the individualistic and the prosocial agents, respectively. McFadden (1974) suggests that  $\bar{R}^2$   
187 values between 0.20 and 0.40 indicate highly desirable model fitting. Plots of the encoded value  
188 functions against the actual value functions revealed non-linear properties (Fig. 2C). The best fitting  
189 learning model also had significantly better fitting relative to two alternative reinforcement learning  
190 models which were fitted to the participants' behaviour in the learning sessions (see Materials and  
191 Methods, all  $F_{2,147}>168$ , all  $p<0.001$ , Bonferroni corrected). The model also predicted human behaviour  
192 significantly better relative to a Bayesian Ideal Observer model that can track social agents' acceptance  
193 probabilities over a numerical grid of self and other reward magnitudes (mean predictive accuracy of the  
194 Ideal Observer model across both learning sessions: 78.9% vs 63.3%; main effect of learning model,  
195  $F(1,98)=283.59$ ,  $p<0.001$ ).

196 A comparison between participants' SVO in terms of degrees, as measured by the SVO Slider Measure(2)  
197 and based on participants' choices in the learning sessions, suggested that participants should be  
198 making predictions actively to encode the preferences of the computerised agents (i.e. not choosing for  
199 oneself; 2-sample Kolmogorov-Smirnov tests, all  $D>0.62$ ; all  $p<0.001$ , Bonferroni corrected; see Fig. 2D).  
200 Similarly, the distribution of participants' SVO based on participants' predictions in the learning sessions  
201 was significantly different between the individualistic and prosocial agents ( $D= 0.28$ ;  $p=0.03$ ), suggesting  
202 that participants relied on different predictions to learn about their opponents' underlying value  
203 functions.

204 We were also interested in understanding the participants' affective reactions to these social agents. In  
205 order to address this issue, after each learning session, we asked the participants to rate the imagined  
206 personalities of these social agents on a number of different domains. The domains were related to  
207 social constructs such as the SVOs of the social agents and how much the participants would like the  
208 agent in real life. Responses to these questions (please see Fig. S1A legends) showed that the prosocial  
209 agent was rated consistently higher relative to the individualistic agent, which conforms to the general  
210 intuition that prosocial individuals would be regarded more positively in real life (2x4 multivariate  
211 ANOVA showing main effect of agent  $F_{3,294}=3.01$ ,  $p=0.03$  and main effect of the interaction term  $F_{3,294}$   
212  $=10.163$ ,  $p<0.001$ ; see Fig. S1A). Particularly the participants' responses to Q3, in which we asked how  
213 many people they know in real-life who behave similarly to the computerised agents whose decisions  
214 they observed, suggests that our experimental manipulation successfully mimicked interactions with



215 real human opponents (1-sample t-test relative to 0 (i.e. computerised agents' decisions do not  
216 resemble any people the participant knows); all  $t > 13$ ; all  $p < .001$ , Bonferroni corrected).

217 **Value-based Decision-Making.** All participants completed a value-based risk decision-making  
218 experiment in which they were asked to choose between 2 probabilistic gambles (see Fig 1A for the task  
219 screen). We used this experiment as our control condition to evaluate the degree to which value-based  
220 decision-making models account for human behaviour in both non-social and social settings. Model  
221 selection based on group-wise sum of BIC (Bayesian Information Criterion) scores suggested that the  
222 best fitting model to participant choices was the one with a power utility parameter that modulates the  
223 reward magnitudes and integrates the magnitudes with outcome probabilities to compute the expected  
224 value difference between available options (see Model 3 in Supplementary Materials and Methods for  
225 mathematical descriptions). The best fitting model in the value-based risk decision-making experiment  
226 had a  $-\log$  likelihood value of 0.242/trial and group-wise sum of BIC score of 2699.

227 We also considered that accumulated winnings over time might have an influence on participants'  
228 choice behaviour. To evaluate this possibility, we included an additional free-parameter to the best  
229 fitting model to account for the influence of accumulated wealth down the trials. However, this model  
230 did not improve the model fits any further, and the value of the added free-parameter (linearly scaling  
231 accumulated winnings) approached zero (mean $\pm$ SD= $1.682 \times 10^{-4} \pm 5.056 \times 10^{-4}$ ), suggesting accumulated  
232 winnings may not have profound influence on participants' choice behaviour.

233 **Social Decision-Making.** Upon completion of the learning sessions, our participants progressed with the  
234 social decision-making experiment(s), where they interacted with these social agents by making  
235 Ultimatum offers for 120 trials against each opponent (see Fig. 1C for task screen).

236 After each social decision-making block, participants were asked to rate how much weight they put on  
237 other's inferred acceptance probability and/or their self-reward magnitudes while making decisions (on  
238 a scale from 0 to 10). Here, a rating of 0 would refer to making decisions only based on inferred  
239 acceptance probabilities; a rating of 10 would refer to relying solely on self-reward magnitudes; and a  
240 rating of 5 would mean their equally weighted integration. In accordance with our predicted value-  
241 based social decision-making model (i.e. making offers based on the expected value difference), our  
242 participants reported that they considered both the other's inferred acceptance probabilities ( $\tilde{q}_A$ ) and  
243 how much they would win if their offer is accepted (i.e. self-reported integration weights were  
244 significantly different than relying on either self-reward magnitudes or encoded acceptance

245 probabilities; all  $p < 0.001$ , Bonferroni corrected, see Fig. 3A). However, the self-reported integration of  
 246 these decision variables while making the offers was significantly different than an integration with  
 247 equal weighting (i.e. participants reported putting more weight on inferred acceptance probability ( $\tilde{q}_A$ ),  
 248 all  $t > 10.46$ ; all  $p < 0.001$ , Bonferroni corrected). Furthermore, there were no significant differences  
 249 between the integration weights reported for the prosocial and the individualistic agents, suggesting  
 250 that our proposed value-based social decision-making model should apply irrespective of the  
 251 opponents' SVO (also in Fig. 3A).

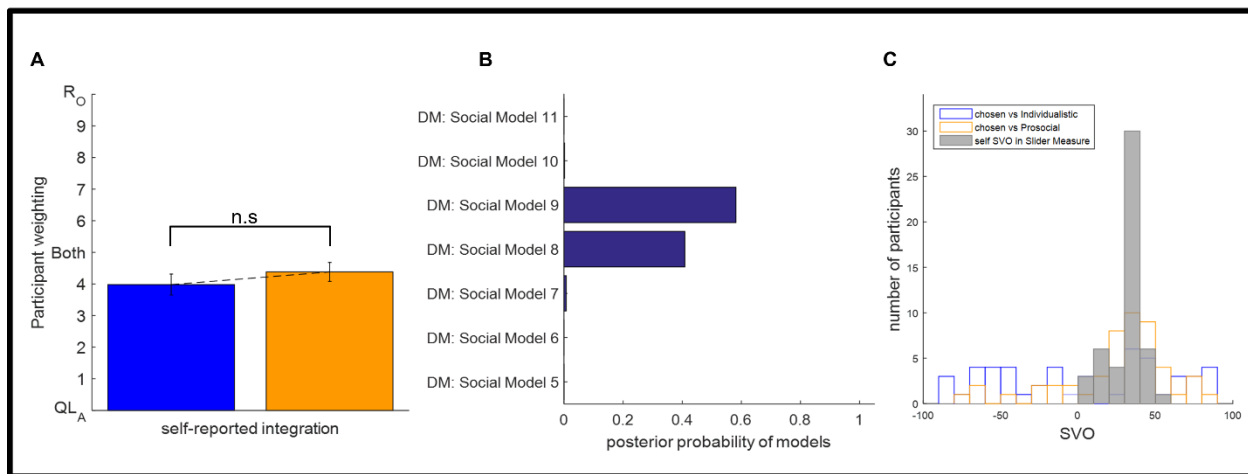

252  
 253 **Fig. 3. Participants' self reported value integration and model selection in the social decision-making experiment. (A)** In line  
 254 **with our proposed model, participants reported that they considered both their self-reward magnitudes and others' inferred**  
 255 **acceptance probabilities. Mean of bars are highly and significantly different than 0 (only consider inferred acceptance**  
 256 **probability, i.e.  $QL_A$ ) and 10 (only consider self-reward magnitude, i.e.  $R_O$ ; all  $P < 0.001$ ). Self-reported integration weights**  
 257 **were comparable against the prosocial and the individualistic agents (n.s: not significant, error bars show  $\pm SEM$ ). (B) Model**  
 258 **selection based on Bayesian posterior probability weights recommends Model 9 (longer bars indicate better fitting), which**  
 259 **computes the expected value difference between the offers by making use of the power utility and the probability weighting**  
 260 **function. (C) Participants' SVOs calculated on the basis of their decisions in the Ultimatum giving experiments were**  
 261 **distributed significantly differently than the distribution of their actual SVOs in real-life (all  $D > 0.26$ ; all  $P \leq 0.056$ ). The vectors**  
 262 **of the SVOs were calculated based on the chosen options and did not correlate with the participants' actual SVO as assessed**  
 263 **by the Slider Measure (all  $P > 0.32$ ).**

264 Model fits (see Supplementary Materials and Methods for mathematical descriptions) revealed that the  
 265 best fitting social decision-making model was the one which modulated the other's inferred acceptance  
 266 probabilities ( $\tilde{q}_A$ ) nonlinearly by a probability weighting function and integrated this information with  
 267 self-reward magnitudes modulated by a power utility parameter that captures participants' risk attitude  
 268 (i.e. Model 9; see Fig. 3B). In Social Decision-Making Model 10, we used participants' self-reported  
 269 integration weights (as in Fig. 3A) as an additional parameter to allow unequally weighted integration of  
 270 the perceived probabilities and reward magnitudes. Bayesian posterior probability weights based on the

271 group-wise sum of BIC scores suggested that Model 10, along with others which mainly rely on either  
272 reward magnitudes or inferred acceptance probabilities could not account for the participants' choice  
273 behaviour. A complementary Bayesian Model Selection approach also favoured the best fitting model  
274 (i.e. Model 9), which had greater exceedance probability than the second-best model (0.73 vs 0.19).

275 One might argue that our approach to modelling participants' choices in the social decision-making task  
276 neglects any learning which might happen in parallel during this stage. If learning continues to take place  
277 during the social decision-making period, the predictive accuracy of our model, which considers the  
278 inferred acceptance probability ( $\tilde{q}_A$ ) solely based on the learning session, should gradually decay down  
279 with increasing trials. In order to investigate this possibility, we segmented the trials in the social  
280 decision-making task into three temporal sections: early (1-40); middle (41-80); and late (81-120) trials  
281 and compared the predictive accuracy of our model across these sections. This control analysis showed  
282 that model predictions were highly stable (all  $F_{2,147} < 0.31$ ; all  $p > 0.73$ ), suggesting that any additional  
283 learning which might take place during the decision-making period would not have a profound effect on  
284 the inferred acceptance probabilities participants used to compute the expected value of offers.

285 Further analysis done by comparing participants' SVOs calculated on the basis of the offers participants  
286 made in the Ultimatum Game versus their SVOs measured by the Slider Measure suggested that the  
287 SVOs were distributed significantly differently (Kolmogorov-Smirnov tests; all  $D > 0.26$ ,  $p \leq 0.056$ ,  
288 uncorrected; see Fig. 3C). These numerical values (i.e. the SVOs calculated based on Ultimatum offers  
289 versus the values from the Slider Measure) were not correlated either ( $-0.141 < r(49) < -0.035$ ,  $0.32 < p$   
290  $< 0.81$ ). In tandem, these results limit the possibility that, in the social decision-making experiments,  
291 participants performed using other cognitive models related to the SVO framework that we did not  
292 consider; and lend further support to our prediction that participants used a cognitive model with a  
293 structure similar to value-based decision-making under risk and uncertainty.

294 **Modulation of value-based decision-making in non-social and social settings.** So far, the main  
295 difference between non-social and social decision-making experiments is that during social decision-  
296 making, people are engaged with additional cognitive processes which involve nonlinear probability  
297 weighting to compute the expected value difference between the options they face (i.e. the differences  
298 between Models 3 (non-social) and 9 (social)).

299 Although inferred probabilities used in the social decision-making task reflects the true nature of social  
300 interactions in everyday life (i.e. one can never know the exact numerical values of the other's

301 acceptance probabilities), it is important to point out that there were structural differences between the  
302 value-based risk decision-making experiment, where the probabilities were given explicitly, and the  
303 social decision-making experiment, where the probabilities were experience-based (i.e. inferred). In  
304 order to understand the degree to which such differences determined the best fitting model, we  
305 conducted an additional control experiment in an independent cohort (n=19; 63.2% males; [mean±SD]  
306 age: 21.3±1.9; SVO:27.8±15.1), in which participants completed all value-based decision-making and  
307 social-learning tasks as before, but were shown the opponents' acceptance probabilities explicitly in the  
308 social decision-making sessions (Fig 1D). The number of participants were relatively lower in the control  
309 experiment. Nevertheless, the effect sizes to detect between-group differences were still high (based on  
310 the simple behavioural results reported in Fig 2A; main experiment Cohen's  $d=1.41$ ; control experiment  
311 Cohen's  $d=1.22$ ).

312 The explicit presentation of others' acceptance probabilities led to a number of differences. First of all,  
313 participants were able to accumulate higher monetary earnings in this condition (main effect of explicit  
314 probabilities ( $F(1,67)=3.231$ ,  $p=.077$ ), indicating a marginally more optimal, but not statistically  
315 significant, expected value difference computation. As one might expect, the best fitting model was  
316 analogous to the one which accounts for the best choice behaviour by the participants in the non-social  
317 value-based decision-making experiment (i.e. integrating explicit probabilities with reward magnitudes  
318 modulated by a power utility parameter). This means that value computations which involve nonlinear  
319 probability weighting are unique to social interactions in which the others' valuation processes are  
320 inferred, whereas power utility modulation of reward magnitudes accounting for people's risk attitudes  
321 is an overarching process across non-social and social contexts.

322 In the next step we wanted to further decompose the differences between value-based decision-making  
323 in non-social and social contexts. To begin with, we conducted a model-free analysis of the participant's  
324 choices by analysing the proportion of risky decisions made in each domain, focusing on the trials where  
325 participants were asked to choose between low probability-high magnitude and low magnitude-high  
326 probability options. This analysis revealed that the frequency of risky choices, after controlling for the  
327 number of trials meeting the criteria described above, was not significantly different across non-social  
328 and social domains (Fig. 4A;  $F_{2,147}=3.263$ ,  $p=0.073$ , Bayes factor for group differences  $BF_{10}=0.516$ ).

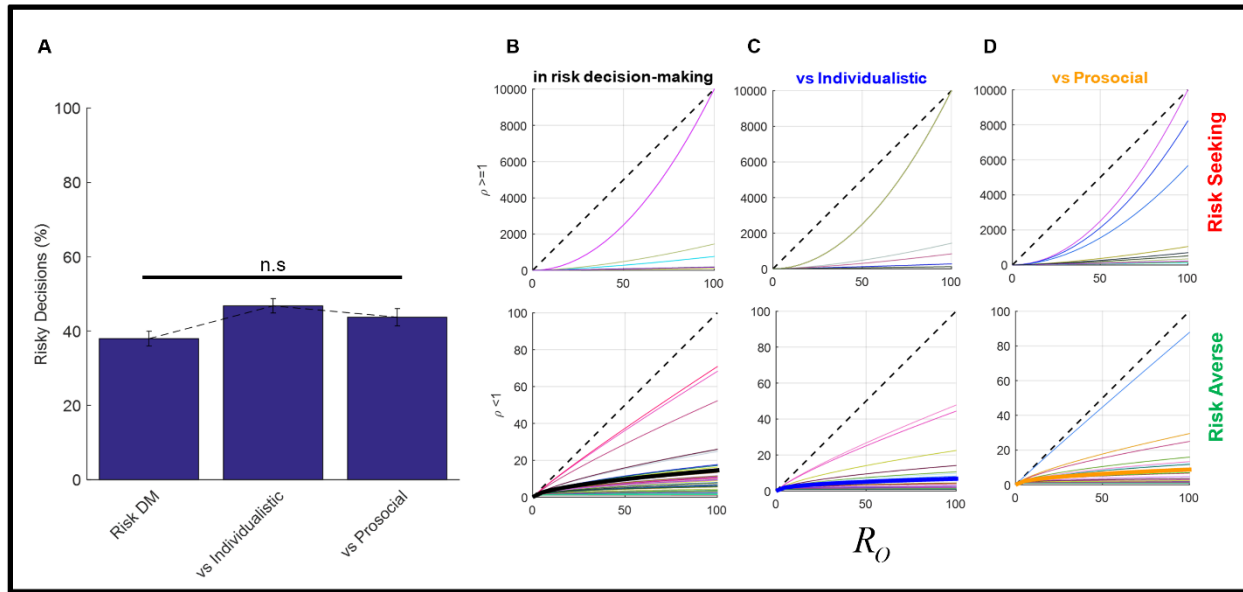

329  
 330 **Fig. 4. Risk decision-making across non-social and social domains. (A) Proportion of risky decisions made in each domain was**  
 331 **not significantly different ( $P=0.07$ ). Parameter estimates modulating the participants gains ( $R_O$ ) in each domain: (B) value-**  
 332 **based risk decision-making; (C) Ultimatum giving against the Individualistic opponent; (D) Ultimatum giving against the**  
 333 **Prosocial opponent. In panels B~D, upper panels show the power utility curves for risk-seeking preferences, whereas the**  
 334 **lower panels show risk-averse preferences. Thin lines with the same [R,G,B] colour coding specify each subject's power**  
 335 **utility curve, and thick lines in black, blue and orange colours show the population means for each domain, where we**  
 336 **observed a pronounced risk aversion across all domains ( $P<.001$ , Bonferroni corrected).**

337 By estimating the power utility parameters separately for the value-based risk decision-making  
 338 experiment (i.e. the non-social context) and the two Ultimatum giving experiments against different  
 339 social agents (i.e. social context), we were able to show that on average our participants displayed a  
 340 pronounced risk aversion across all domains (all  $p<0.001$ , Bonferroni corrected relative to risk neutrality  
 341  $\rho = 1$ , see Fig. 4B-D for power utility curves). These parameters were estimated separately in each  
 342 domain and correlated significantly with the proportion of risky decisions the participants made in those  
 343 domains (all  $r(49) > .421$ , all  $p<.0024$ , Bonferroni corrected for pairwise comparisons). Although our  
 344 participants were slightly more risk-seeking against the individualistic agent, this difference was not  
 345 significantly higher ( $p=0.638$ , see Fig. S2), supporting our *a priori* prediction at the population level that  
 346 people should not be acting in a consistently risk-seeking manner against one type of social agent.

347 The power utility parameter estimates from the non-social value-based experiment were not  
 348 significantly correlated with the estimates from the social decision-making experiments (all  $r(49)<.27$ , all  
 349  $p>.06$ , Bonferroni corrected). Furthermore, power utility parameters were not correlated within the  
 350 social decision-making domain either ( $r(49)=.20$ ,  $p=.173$ ), indicating that people may have an  
 351 independent risk attitude in social interactions. However, in sharp contrast to these findings, the risk

352 parameters were significantly correlated when the others' acceptance probabilities were given explicitly  
353 ( $r(18)=.55$ ,  $p=.015$ ).

354 A mostly comparable picture emerged for the probability weighting parameters estimated from the  
355 Ultimatum giving experiments (Fig 5). Despite individual variability, parameter estimates were not  
356 significantly different than  $\beta=1$  at the population level (i.e. where  $\beta=1$  describes the diagonal line where  
357 the actual and perceived probabilities are equal; all  $p>.06$ ) and the population mean of these estimates  
358 were comparable between individualistic and prosocial agents ( $p>.91$ ). However, within-subjects  
359 correlation for the probability weighting parameters was not significant ( $r(49)=-.065$ ,  $p=.65$ ), indicating  
360 that probability weighting in social decision-making is not a hardwired trait applicable to different  
361 scenarios, but rather adaptive to the changing characteristics of one's opponents.

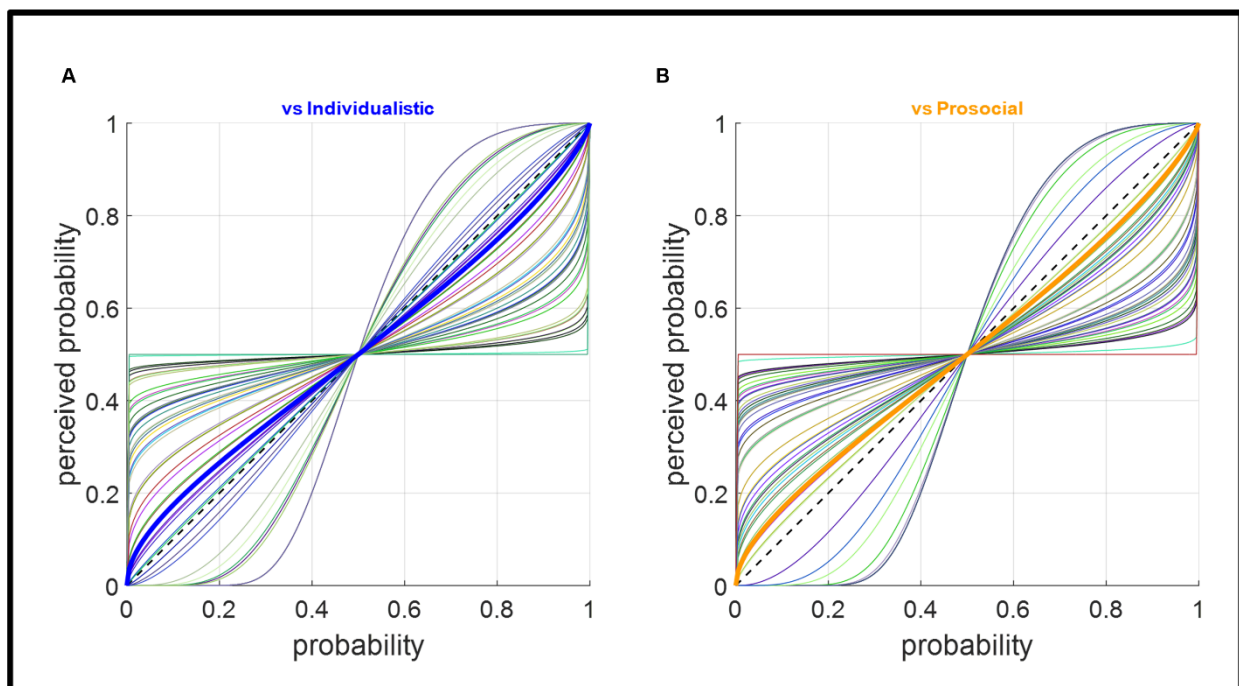

362

363 **Fig. 5. Probability weighting in social decision-making (based on  $\log_2$  functional form). At the population level, parameter**  
364 **estimates (thick blue and orange lines showing the population mean) were not significantly different than 1 (diagonal dashed**  
365 **lines where the actual and perceived probabilities are equal; all  $p>.06$ ), and these estimates were statistically comparable**  
366 **between individualistic and prosocial agents ( $p>.91$ ). In both panels, thin lines with the same [R,G,B] colour coding specify**  
367 **each participants's probability weighting curve.**

368 Intriguingly, the individual variability observed for the power utility and the probability weighting  
369 parameters mostly converge at the population level, and choice probability curves suggest that human  
370 participants make nearly optimal decisions in giving Ultimatum offers as they make non-social value-  
371 based decisions under uncertainty (Fig. 6).

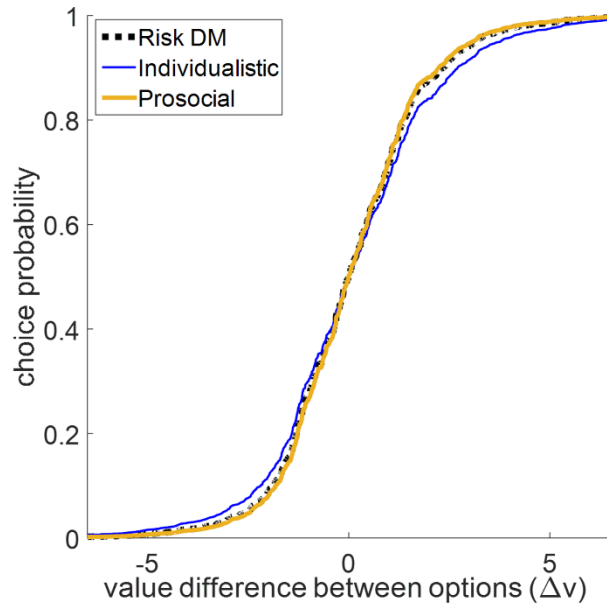

372

373 Fig. 6. Choice probability curves across non-social and social decision-making shows that human participants can make nearly  
 374 optimal decisions while giving Ultimatum offers as they would in a non-social context (i.e. value-based risk decision-making,  
 375 Fig 1A). X-Axis shows the value difference between each option computed according to Model 1 (Eq. 5).

376 The preceding analyses of the parameter estimates and choice probability curves suggested that human  
 377 participants show a degree of adaptation during social decision-making which allows them to make  
 378 nearly optimal decisions as they would in a non-social setting. Next, we wanted to explain the “social”  
 379 risk and probability weighting parameters estimated from our Ultimatum giving experiments by a  
 380 number of predictive variables to evaluate the extent to which people’s decision parameters are  
 381 influenced by social variables describing degrees of prosociality. Our hypothesis was that people’s  
 382 decision parameters in social interactions should depend on their SVO; their inference about the SVO of  
 383 their opponents ( $S\tilde{V}O$ ; including one’s uncertainty about this estimate); and how prosocial they think  
 384 their opponent is relative to themselves. Here, the relative prosociality term (i.e. difference between self  
 385 and other) allows us to model the extent of the parameter adjustment in social interactions, particularly  
 386 in situations where people judge their opponents to be more or less prosocial than themselves. To test  
 387 this prediction, we constructed two multiple linear regression models with these predictive variables:

388 
$$[\rho, \gamma]^S = \beta_0 + \beta_1 * SVO + \beta_2 * S\tilde{V}O_\mu^S + \beta_3 * S\tilde{V}O_\sigma^S + \beta_4 * (S\tilde{V}O_\mu^S - SVO) + \varepsilon$$

389 where  $[\rho, \gamma]^S$  are the risk and the probability weighting parameters, respectively, estimated

390 separately from the Ultimatum giving experiments, and  $S \in \{i, p\}$  defines whether the opponent is

391 individualistic or prosocial. Here, it is important to point out that participants' inferences about their  
392 opponent's SVO ( $SVO^S$ ) depend on their encoded value function ( $\tilde{q}_A$ ) from the learning sessions, which  
393 has a stochastic nature (i.e. a sigmoid function). In order to get the best estimate of the opponent's  
394 inferred SVO in degrees, we ran the learning model with each participant's estimated parameters  
395 through the learning stimuli 1000 times per participant per social agent and calculated the resulting  
396 SVOs in degrees (see Fig. S3A). We used both the mean ( $\mu$ ) and the standard deviation ( $\sigma$ ) of the  
397 distribution of calculated SVOs from these 1000 simulations as the best estimate of the opponent's  
398 inferred SVO and the participant's uncertainty about this estimate, and included these scalar values for  
399 each participant in our regression model (see Fig. S3B and legends).

400 To control for potential outliers in the population, we performed a leave-one-out cross-validation  
401 procedure and repeated the described multiple linear regression analysis. Further analysis which was  
402 done on the regression coefficients by performing 1-sample t-tests from baseline, suggested that the  
403 uncertainty term has an overarching influence on both the social risk and probability weighting  
404 parameters (all  $|t(49)| > 5.02$ , all  $p < .001$ ), whereas one's own SVO uniquely contributed to one's risk  
405 attitude only in social interactions with an individualistic opponent ( $t(49) = -9.66$ ,  $p < .001$ ; all Bonferroni  
406 corrected, set level for the p-value is 0.003 for 16 comparisons, see Fig.7).

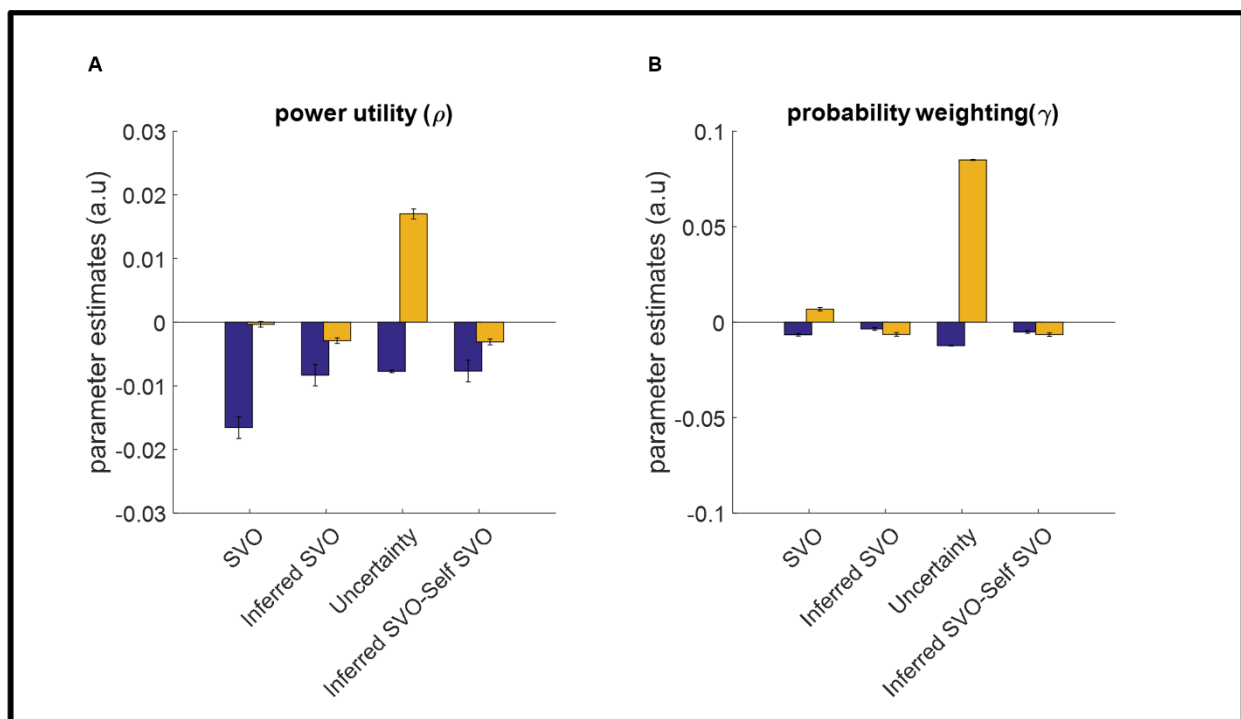

407



408 Fig. 7. Parameter estimates  $\{\beta_1 \dots \beta_4\}$  from two leave-one-out cross-validated multiple linear regression models accounting  
409 for the social risk and probability weighting parameters (y-axis in panels A and B, respectively). Variables in the x-axis refer  
410 to those described in the main text: SVO, participants' Social Value Orientation; Inferred SVO,  $S\tilde{V}O_\mu$ ; Uncertainty,  $S\tilde{V}O_\sigma$ ;  
411 Inferred SVO-Self SVO,  $(S\tilde{V}O_\mu - SVO)$ . Apart from the effect of SVO on the power utility parameter for the prosocial  
412 agent (orange bar in panel A), all regression coefficients are significant (Bonferroni corrected, set level  $6 \times 10^{-5}$ ).

413 Finally, we wanted to provide a complementary model-free validation of the linear regression model,  
414 which showed that the variables that describe the participant's and the opponent's degree of  
415 prosociality influence how people adjust their risk attitudes in social interactions (see Fig 7A). If our  
416 approach is correct, participants' frequency of choosing risky options (see Fig 4A), the risk parameters ( $\rho$ )  
417 estimated from the Ultimatum giving experiments, and the predictions of the model described  
418 above should line-up reasonably along the diagonal of this 3-dimensional parameter space. Subsequent  
419 analysis conducted on these 3 variables suggested that the predicted risk parameters were significantly  
420 correlated with both the estimated risk parameters and the participants' frequency of choosing risky  
421 options in the Ultimatum giving experiments (all  $r(49) > .383$ , all  $p < .006$ , Bonferroni corrected for 6  
422 comparisons, see Fig. S4 and legends), providing converging evidence that supports of our model.

423 **Response Times.** Visual inspection of response time (RT) histograms suggested that RTs have a skewed  
424 distribution that violates the normality assumption. Following the recommendation of Whelan 2008  
425 (12), we analysed the distribution of RTs across three domains (i.e. risk decision-making, social learning  
426 and social decision-making). Distributions were comparable within social learning and decision-making  
427 domains (Kolmogorov-Smirnov tests; all  $D \geq 0.12$ , all  $p > .50$ ).

428 In a complementary analysis, we excluded data from 5 participants which were clear outliers. We  
429 transformed the concatenated data using a Box-Cox transformation (13) implemented in MATLAB.  
430 Overall, there was a significant main effect of the experiment type (i.e. risk decision-making, social  
431 learning and social decision-making) on RTs ( $F(2,222) = 22.623$ ,  $p < .001$ ). RTs in the social decision-making  
432 experiments were significantly longer than those in the social-learning experiments ( $t(178) = 6.576$ ,  
433  $p < .001$ ), highlighting the suitability of the value-based risk model applied to the social decision-making  
434 context, where we predicted that our participants should integrate their opponents' inferred acceptance  
435 probabilities with their self-reward magnitudes while making Ultimatum offers. The RTs were  
436 comparable both within the social learning and decision-making experiments between individualistic  
437 and prosocial agents (all  $t(88) < .141$ , all  $p > .164$ ; Fig. 8).

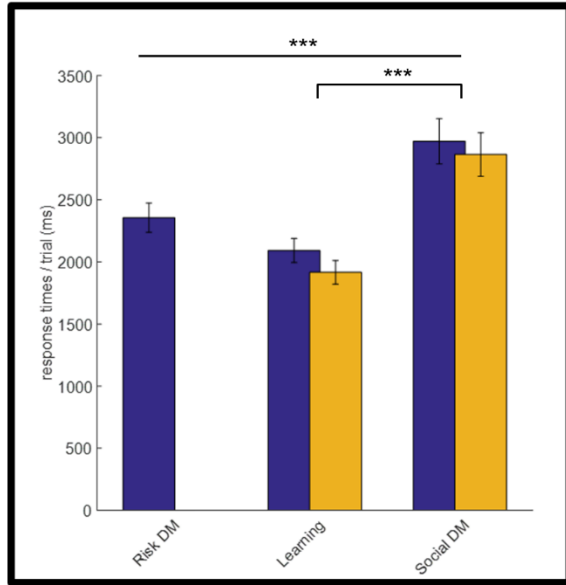

438

439 **Fig. 8. Response times across all experimental sessions. Response times between 3 domains were significantly different.**  
440 **Response times were longer in the social decision-making experiments relative to the social-learning experiments (\*\***  
441 **P<0.001). Across social-learning and social decision-making experiments, there were no significant differences between**  
442 **prosocial/individualistic conditions.**

443

444

445

446

447

448

449

450

451

452

453

454

455 **Discussion:**

456 In line with our prediction, the present results suggest that in social interactions which involve resource  
457 distributions between two individuals, people employ a cognitive model which shares properties with  
458 well-established computational models of value-based decision-making under uncertainty (14-16).  
459 However, unlike risk decision-making paradigms in which probability and reward information is usually  
460 given explicitly (17-20), in social interactions people need to infer others' valuation processes (Fig. 2C) in  
461 order to make value-based decisions (21). Here, we showed that risk perception is an overarching  
462 process across non-social and social domains, whereas cognitive processes related to probability  
463 weighting are unique to social interactions in which the opponent's valuation processes needs to be  
464 inferred. Even though social interactions demand higher-level cognitive inferences, human participants  
465 manage to make decisions nearly optimal decisions, as they would in a non-social context (Fig. 6). This  
466 near-optimal decision-making is achieved by people's ability to adjust their decision parameters  
467 adaptively to the changing characteristics of their opponents (Fig. 7 and Fig. S4). The independence of  
468 risk and probability weighting parameter estimates within each domain are particularly important,  
469 because with a careful sequencing approach similar to a gradient decent, we were able to minimise the  
470 correlation between decision variables (22) over  $2 \times 10^6$  iterations, and make the face values of the  
471 reward distributions in the Ultimatum giving experiments identical for both opponents (i.e.  
472 prosocial/individualistic social agents, where the order of presentation was randomised for each subject  
473 and for each type of opponent). Our experimental design required participants to utilise their  
474 opponent's encoded value function to compute the expected value difference between two options that  
475 were only cued by the colour of the icon representing their opponents (Fig. 1C). This approach  
476 minimises the possibility that within-subject differences in risk and probability weighting parameters  
477 (Fig. 4) were due to differences in the numerical components of the stimuli. In a control experiment, we  
478 further demonstrated that having an independent risk attitude is unique to situations which mimic real-  
479 life social decision-making, where people need to infer their opponents' acceptance probabilities.

480 In mainstream economics and finance, people's risk preference is often regarded as a hard-wired trait.  
481 However, a number of recent studies have suggested that risk parameters may be subjected to  
482 influence after observing others' decisions performed in the same context(23-25), challenging this view.  
483 Here, by focusing on social interactions, we provide evidence to suggest that even in the absence of  
484 observations of comparable decisions as used by these previous studies (23-25), people's risk-  
485 preferences may be subject to change in a social context depending on the nature of the social

486 interaction they are engaged in. While the impact of social framing on risk-preferences has previously  
487 been investigated in the context of the Trust Game, where outcome probabilities were explicitly stated  
488 (26), to the best of our knowledge the present study is the first to describe the value computations  
489 underlying how human participants choose between Ultimatum offers where the outcome probabilities  
490 are directly related to inferences about the value functions of opponents.

491 It is worthwhile to emphasise that our experimental design did not have any element of observing  
492 others' risk preferences. Instead, as we have shown, we anticipated that the perception of risk should  
493 emerge naturally due to the fact that the outcomes of these social interactions were probabilistic. We  
494 propose that "social" decision parameters may be adaptive to accommodate different interpersonal  
495 negotiation scenarios. Our subsequent multiple linear regression analyses (Fig. 7) provide evidence to  
496 support this claim, considering that key social variables related to human prosociality make differential,  
497 but mostly significant contributions to fine-tune risk (Fig. 4) and probability weighting (Fig. 5)  
498 parameters irrespective of the opponent's SVO. Although designing two different computerised social  
499 agents increased our experimental difficulty in terms of number of the trials our participants needed to  
500 complete ( $t=700$ ), it also allowed us to reveal these overarching contributions, which we think are very  
501 important for developing cognitive/computational models of social interactions.

502 It is necessary to comment on why we decided against the inclusion of a "competitive" agent (based on  
503 the definition of Murphy et. al) in our experimental design. Previous studies with relatively large sample  
504 sizes investigating SVO in the population showed that the population density of competitive individuals  
505 are only around 9% (27). Furthermore, people with competitive SVO are driven by achieving superiority  
506 over others, which limits them to only accept offers that satisfy this superiority criterion, making their  
507 underlying value function unsuitable for probing risk perception in social interactions. Additionally, the  
508 inclusion of a "competitive" agent would require our participants to complete at least an additional 300  
509 trials (across social learning and decision-making sessions), making it feasibly difficult to achieve.

510 Considering that in our cohort participants' SVOs and participants' inferences about the SVOs of their  
511 opponents showed a healthy degree of variability and focusing on each pairwise combination ( $n=100$ ,  
512 see Fig. S5), we think our proposed model suitably meets the generalisability criteria to account for  
513 value computations in the many different social interactions that occur in real life.

514 Our study also has implications for understanding interactions in the Ultimatum Game, where the wide  
515 majority of the previous literature focused on responders' behaviour (3, 28-33). In our study, the  
516 participants were explicitly instructed to treat the binary options they were presented with like thoughts

517 in their mind, such that they knew their opponents can only see the chosen offer and can never know  
518 whether the unchosen option was better or worse. The structure of our experiment which allowed our  
519 participants to make offers from a binary selection complements previous Ultimatum Game studies  
520 where responders were commonly asked to make decisions about a single offer per trial. Under these  
521 conditions, a power utility parameter modulating self-reward magnitudes and a probability weighting  
522 parameter modulating other's inferred acceptance probabilities described the best fitting model to  
523 participants' choice behaviour (Fig. 3B). Participants' self-reporting also suggested that both the self-  
524 reward magnitudes and the others' inferred acceptance probabilities need to be considered while  
525 making Ultimatum offers (Fig. 3A). To the best of our knowledge, the current study is also the first to  
526 address value computations underlying Ultimatum giving, and it provides evidence to suggest that  
527 proposers' do not solely rely on responders' acceptance probabilities, but make offers based on their  
528 expected value. Based on these findings, we recommend that future cluster(34) or hyper-scanning(35)  
529 studies of Ultimatum bargaining in neuroeconomics should consider computational models which  
530 explicitly parametrize participants' risk and probability weighting preferences.

531 Finally, although the social-learning session was not our main focus in this work, we showed behavioural  
532 computational evidence to suggest that our participants could suitably transfer the encoded value  
533 functions of others from one (learning) environment (i.e. observing social agents' responses to singular  
534 Ultimatum offers) to another in which they were asked to solve an optimal social decision problem (i.e.  
535 making Ultimatum offers from binary options). We showed evidence to suggest that human learners do  
536 not represent their opponents in terms of large numerical self and other reward grids to encode their  
537 value functions like a Bayesian Ideal Observer model would do. As a result, in the context of our current  
538 experiment, a simpler social value orientation model predicted human social learning behaviour better.  
539 These results are mostly in line with previous learning literature which put forward Bayesian Ideal  
540 Observer models to reveal hidden parameters of a generative process (e.g. estimated outcome volatility;  
541 Behrens et al., 2007, Browning et al., 2015, Pulcu and Browning, 2017) but do not necessarily predict  
542 participant choice behaviour better than simpler learning models. We think that our behavioural study  
543 highlights the need for further research in three main streams, ideally involving functional magnetic  
544 resonance imaging (fMRI): (i) what are the regions involved with neural computations underlying how  
545 people transfer the encoded value functions of their opponents in social interactions; (ii) what are the  
546 neural mechanisms responsible for tracking the value functions of opponents with different SVOs; and  
547 (iii) which brain regions encode the estimated trial-by-trial variability in the social risk and probability  
548 weighting parameters.

549 **Author Contributions**

550 E. Pulcu and M. Haruno developed the study concept and contributed to the study design. Testing, data  
551 collection, data analysis and interpretation were performed by E. Pulcu under the supervision of M.  
552 Haruno. E. Pulcu drafted the manuscript, and M. Haruno provided critical revisions. Both authors  
553 approved the final version of the manuscript for submission.

554 **Acknowledgements**

555 The study was funded by CREST, JST, COI to Osaka University, JST and KAKENNHI (17H06314 and  
556 26242087) awarded to M. Haruno. The funders had no role in study design, data collection and analysis,  
557 decision to publish or preparation of the manuscript. We are grateful to Satoshi Tada for technical  
558 assistance and Dr. Michael Browning, Prof. Jon Roiser and Prof. Mauricio Delgado for their  
559 recommendations on an earlier version of this manuscript.

560

561

562

563

564

565

566

567

568

569

570

571

572

573 **Materials and Methods**

574 **Participants.** In total 50 healthy individuals (54% males) who reported no history or current neurological  
575 or psychiatric disorders, or use of any psychotropic medication were recruited from the general  
576 population. The average age of this cohort was 31.5 (range: 20-56 years;  $STD=\pm 9.49$ ). On average the  
577 participants had 16 years of education ( $STD= 2.1$  years) and reported annual income of 1.91 million  
578 Japanese Yen ( $STD=1.71$  million Yen). This cohort was recruited from the general population with a  
579 convenience sampling approach and contained a higher percentage of prosocial individuals ( $n=29$  vs  $n=5$   
580 individualistic participants according to the categorical classification of the SVO Triple Dominance  
581 Measure(36) which penalises inconsistent responses).

582 **Experimental Procedures.** The study took place at the Center for Information and Neural Networks  
583 (CiNet) and was approved by the CiNet Research Ethics Committee. Participants who met the inclusion  
584 criteria were given an appointment for the behavioural experiments. The testing session began by an  
585 explanation of the research procedures, followed by obtaining an informed consent. Prior to any  
586 experiments, the participants completed a battery of questionnaires related to their demographic  
587 information and Social Value Orientation (SVO) in pen and paper format.

588 Before the computerised experiments, the colour coding of icons was explained to the participants (see  
589 Fig 1). The red icon always represented the participant him/herself. In the paradigms which had a social  
590 component, the blue icon always designated the individualistic opponent and the orange icon always  
591 represented the prosocial opponent. Because the computerised testing involved completing 700 trials  
592 across different paradigms, we wanted to minimise participant errors (e.g. due to fatigue) by keeping  
593 the colour coding consistent throughout the testing session.

594 The participants first completed the value-based risk decision-making task which lasted for 100 trials  
595 (Fig. 1A). This task was designed to capture participants non-social value-based decision-making  
596 preferences at baseline. The risk decision-making task involved binary decisions between two  
597 probabilistic gambles, where outcome reward magnitudes (between 10 and 100 Japanese Yen) and  
598 outcome probabilities were generated by MATLAB's *rand* and *randsample* functions (for probabilities  
599 and reward magnitudes, respectively). These decision variables were shuffled until they were  
600 decorrelated, and the expected value difference between the options, calculated based on Eq. 5 and 10  
601 (see below), was normally distributed with mean  $\sim 0$ . These features of the stimuli allow the fitted

602 stochastic choice function to capture how participants behaviour shift from one option to the other in  
603 relation to the changing expected value difference between options, from negative to positive.

604 After this stage, the participants completed the learning sessions for both the individualistic and  
605 prosocial agents, in which they were asked to predict whether the social agents will accept or reject the  
606 offers coming from other anonymous individuals. The Ultimatum offers were also generated to be  
607 between 10 and 100 Japanese Yen. The participants were told that the social agents whose Ultimatum  
608 responses they needed to predict were two participants from a previous study conducted by our  
609 research group. In fact, they were computerised agents making decisions following an underlying value  
610 function (see below for details). A similar methodology is frequently used in behavioural studies  
611 conducted by other research groups (25, 37). The learning sessions contained 180 trials each, and the  
612 order of the learning sessions was counterbalanced across participants. The participants won ¥25 for  
613 every correct prediction, which was added to their performance-based reimbursement. Incorrect  
614 predictions did not change participants' running total. After completing the learning sessions,  
615 participants were asked to respond to various descriptive questions while considering the imagined  
616 personalities of these social agents (see the full list of questions in Fig. S1 legend).

617 Finally, the participants completed the social decision-making experiments, for 120 trials against each  
618 social agent in the same order they completed the learning sessions. With careful sequencing of  
619 Ultimatum offers presented in the social decision-making stage, we were able to make the face values of  
620 the binary Ultimatum offers identical for each social agent. Consequently, the participants needed to  
621 use the value function of different opponents to compute the expected value difference between the  
622 binary offers in the Ultimatum giving experiment, even though their face values were the same. This  
623 approach allowed us to control for any change in decision parameters which can be attributed to the  
624 numerical differences in the stimuli. The presentation order of the trials was purely randomised across  
625 all participants. In the Ultimatum giving experiment, participants obtained the monetary amount ( $R_0$ ) in  
626 all of their accepted offers. This amount was also added to their performance-based reimbursement. All  
627 of the behavioural experiments were self-paced, and participants were paid the total amount they  
628 accumulated across social learning and all decision-making experiments (both non-social and social  
629 experiments; i.e. all participant decisions had real-life financial consequences). All experiments took  
630 place in a comfortable room designated for testing purposes and all tasks were presented by  
631 PsychToolbox 3.0 running on MATLAB (MathWorks, Inc.).



632 **Description of the computerised social agents.** Two distinct computerised social agents, whose  
633 behaviours were guided by the way they computed the subjective value of the Ultimatum offers they  
634 faced were defined by a model from the social value orientation (SVO) framework based on a model  
635 derived from a previous publication by our research group (1). Here, the subjective value ( $\tilde{v}$ ) of a  
636 condition is calculated as:

$$637 \quad \tilde{v} = \alpha R_S - \delta R_O + \rho |R_S - R_O| \quad (1)$$

638 where  $R_S$  (always from the perspective of the social agents) and  $R_O$  depicts self and other's reward  
639 magnitude, respectively. The agents make decisions following a stochastic choice model where  $q_A$  is the  
640 probability of accepting a condition (38):

$$641 \quad q_A = 1 / (1 + \exp^{-\beta \tilde{v}}) \quad (2)$$

642 Here,  $\beta$  is the inverse temperature term, which gives the shape of the sigmoid function based on our *a*  
643 *priori* assumption about the shape of the sigmoid function in humans, which should be the case if the  
644 number of trials in the learning session approaches to infinity; that is, if the participants had the  
645 opportunity to observe the behaviour of the computerised social agents for a very long time.

646 The hyper-parameters defining the valuation of the agents,  $\alpha, \delta, \rho, \beta$  were set to [1.096, 0.382, -2.512,  
647 0.037] for the individualistic agent; and [1.368, -0.644, -3.798, 0.045] for the prosocial agent. The key  
648 difference between these two agents was that the prosocial agent valued conditions cooperatively,  
649 whereas the individualistic agent valued them competitively, and that the prosocial agent was more  
650 sensitive to the absolute value difference between the self and other's reward magnitude. We  
651 generated a vector of responses to 180 trials in the learning sessions by the defined model, where the  
652 SVO of the social agents was calculated by the following formula derived from Murphy et al. 2011:

$$653 \quad SVO^\circ = \arctan\left(\frac{(\sum R_O) / n_A - 50}{(\sum R_S) / n_A - 50}\right) \quad (3)$$

654 where  $n_A$  is the total number of accepted conditions. After extensive simulations to evaluate how  
655 agents would behave, a selection was made such that the SVO of the prosocial agent was  $31.47^\circ$  and the  
656 SVO of the individualistic agent was  $12.36^\circ$ ; clearly falling into the categorical boundaries described by  
657 Murphy et al., 2011. Therefore, these strategies were labelled as "prosocial" and "individualistic"  
658 throughout this manuscript.

659 In order to make sure that the choice behaviour of these computerised agents will adequately mimic  
660 decisions of real human participants, we conducted an additional control experiment in which  
661 participants in an independent cohort ( $n=40$ ; age:  $21\pm 2.1$ ; 60% males; SVO:  $25.7\pm 15.6$ ) responded to  
662 Ultimatum offers coming from different proposers, as it was in the social learning sessions of the main  
663 experiment. We simulated the choices of the computerised agents 100 times for each participant and  
664 investigated the extent to which their decisions coincided with the decisions made by real humans. This  
665 control experiment suggested that the behaviour of computerised agents would be well tolerated in the  
666 main experiment, particularly considering that the offers being evaluated covered the indifference point  
667 (i.e. expected value difference near 0), which is where the choices of the computerised agents and real  
668 human participants would be random ( $\sim 50\%$  accept, see Fig. S6 and legends). In addition to this  
669 numerical analysis conducted in an independent cohort, it is important to point out that our participants  
670 were able to identify at least  $\sim 4$  people in their close circles whose decisions resembled the decisions  
671 made by the computerised agents (see Fig. S1, responses to Q3), suggesting that the behaviour of the  
672 computerised agents in the main experiment was overall well tolerated.

673 **Social-learning.** There are a few models in the literature that account for how people learn during social  
674 interactions (21, 39, 40). Due to the widely-known complexity of this process (41, 42), we did not focus  
675 too much on specific models of social-learning by performing detailed trial-by-trial analyses here.  
676 Previous studies suggested that using the Ultimatum Game as an environment to investigate how  
677 people learn other's social preferences is challenging due to the fact that the game structure has a  
678 strong non-monotonicity (42), as people are shown to be sensitive to unfair resource distributions  
679 irrespective of whether they are favourable or not. Nevertheless, the social learning experiments were  
680 still necessary in order to model how inferred probabilities are processed during the Ultimatum giving  
681 experiments, in which we anticipated that our experimental setting will naturally reveal how our  
682 participants evaluate the risks associated with the possibility of others rejecting their offers. Therefore,  
683 we modelled this first step based on the assumption that learning occurs through the successful  
684 simulation of another's valuation model (43) (achieved by model-free, reinforcement or Bayesian  
685 learning, or their weighted combination) such that as the number of trials ( $t$ ) approach to infinity,  
686  $\tilde{q}_A \rightarrow q_A | t \rightarrow \infty$ , that is, the participant's inferred acceptance probability ( $\tilde{q}_A$ ) will fully converge to  
687 the social agent's true acceptance probability ( $q_A$ ). We confirmed that social learning occurs suitably  
688 well by performing model-free analysis of the data from the learning sessions and also by fitting the

689 proposed valuation model of the social agents to the participants' choice data to generate the  
690 participants' inferred choice probability for each social agent ( $\tilde{q}_A$ ; see Fig. 2).

691 Although the learning session was not our primary focus, we still wanted to compare the performance  
692 of the social valuation model with two alternative Rescorla-Wagner models (44) and one Bayesian Ideal  
693 observer model, which were fitted to the participants' choice behaviour in the learning sessions.

694 In alternative Model 1, the participant updates his/her estimate of the social agent's overall acceptance  
695 probability on trial  $t$  in proportion to the prediction errors ( $\mathcal{E}$ ) on trial  $t-1$  on a trial-by-trial basis:

$$696 \quad \tilde{q}_{A(t+1)} = \tilde{q}_{A(t)} + \eta_{\tilde{q}_A} \mathcal{E}_{(t)} \quad (3)$$

697 where  $\eta_{\tilde{q}_A}$  is the learning rate. In alternative Model 2, each of the social agent's parameters in the  
698 described SVO model (Eq.1 and 2) is updated on a trial-by-trial basis, for example:

$$699 \quad \alpha_{(t+1)} = \alpha_{(t)} + \eta_{\alpha} \mathcal{E}_{(t)} \quad (4)$$

700 where  $\eta_{\alpha}$  is the learning rate updating the value of the free-parameter  $\alpha$  from trial  $t$  to  $t+1$ . This second  
701 model has 4 free parameters that represent the learning rates by which participants updated each of  
702 the parameters of the SVO-based valuation model (Eqs. 1 and 2).

703 The Bayesian Ideal Observer model would represent each Ultimatum offer over a numerical grid of  
704 reward magnitudes for the self and the other. The model would start with flat priors (i.e. all inferred  
705 acceptance probabilities set to 0.5 on trial 1;  $a=1$ ,  $b=1$ ) and learn the other's Ultimatum preferences by  
706 updating the mean of the nested beta distributions ( $\mu = \frac{a}{a+b}$ ) over this numerical grid following each  
707 observation (e.g.  $a=a+1$  after each accept and  $b=b+1$  after each reject response). Because the 180 trials  
708 that our participants completed in the learning sessions are not enough to cover the whole numerical  
709 grid, we used a 3x3 smoothing kernel over the model's inferred acceptance probabilities (see  
710 Supplementary Video for the behaviour of the Bayesian model throughout the learning session),  
711 allowing the model to make inferences dynamically for seemingly comparable offers as humans would  
712 do.

713 Model comparisons for the learning session favoured the SVO-based valuation model, which had  
714 significantly lower  $-\log$  likelihood values relative to the reinforcement learning models (all  $F_{2,147} > 168$ , all

715  $p < 0.001$ , Bonferroni corrected). Furthermore, the close relationship observed between  $q_A$  and  $\tilde{q}_A$  from  
716 the SVO model as well as model fitting metrics falling into the highly desirable range (11) suggest that  
717 the present approach is suitable for obtaining the participants' inferred acceptance probabilities. Similar  
718 approximations have been used by other research groups to reduce the model complexity of learning in  
719 social decision-making tasks (21).

720 **Description of the computational models for the control experiment.** Considering that our social  
721 agents were designed to make choices following specified value functions, interacting with them in the  
722 main experiment should naturally probe a perception of risk. Consequently, we decided to select a  
723 value-based risk decision-making task (Fig. 1A) as our control experiment. This selection enabled us to  
724 understand whether people use an overarching computational model in non-social and social contexts  
725 for value-based decision-making under risk and uncertainty. We fitted various computational models to  
726 the participants' choice behaviour, as described below.

727 In line with the previous literature, we modelled value-based decision-making in a way which allows  
728 human participants to make binary choices between probabilistic gambles by computing the expected  
729 value ( $\pi$ ) of the options they face:

$$730 \quad \pi = mp \quad (5)$$

731 where  $m$  is the reward magnitude,  $p$  is the probability associated with an option, and  $\pi$  is their  
732 multiplicative integration (Model 1). However, previous work showed evidence for nonlinear  
733 modulation of outcome probabilities in human value-based decision-making (25)(45). In order to  
734 capture these processes, we utilised a probability weighting function based on previous studies (43, 46):

$$735 \quad \hat{p} = 2^{(-(-\log_2(p))^{\gamma_R})} \quad (6)$$

736 where  $\gamma_R > 0$  is a free parameter which modulates actual outcome probabilities nonlinearly into  
737 subjective probabilities. The  $\log_2$  function always crosses the  $p/p$  diagonal at 0.5 and in our point of view  
738 accurately captures the intuition that people should have a somewhat accurate perception of 50/50  
739 odds. Participants then compute the expected value of a gamble accordingly (Model 2):

$$740 \quad \pi = m\hat{p} \quad (7)$$

741 In an alternative model (Model 3), we considered an expected value computation which can account for  
742 participants' risk-preferences by revealing the curvature of their utility functions:

743 
$$\pi = m^\rho p \tag{8}$$

744 where  $\rho$  is the power utility parameter, with  $\rho > 1$  indicating a risk-seeking,  $\rho < 1$  indicating a risk-averse and  $\rho = 1$  indicating a risk-neutral preference.

746 Finally, the full model (Model 4) considered both of these nonlinear processes in computing the expected value of an option:

748 
$$\pi = m^\rho \hat{p} \tag{9}$$

749 Across all models, it is assumed that participants make their choices in relation to the subjective value difference between each gamble (i.e. the difference between the left and right options):

751 
$$\Delta \tilde{\pi} = \pi_L - \pi_R \tag{10}$$

752 and trial-wise stochastic choice probabilities for each gamble are generated by a sigmoid function:

753 
$$q_L = 1 / (1 + \exp^{-\beta(\Delta \tilde{\pi})}) \tag{11}$$

754 where  $\beta > 0$  is the inverse temperature term adopted from thermodynamics and determines the degree of stochasticity in participants' choices.

756 **Description of the social decision-making models.** In the main experiment, the participants were asked to make Ultimatum offers to the social agents. If their offer was accepted, participants would receive the amount  $R_O$ , whereas if their offer is rejected both sides got nothing for that trial (as in a typical Ultimatum Game experiment).

760 It is possible that participants completed the social decision-making task using a number of different strategies. Here, we considered cognitive models with variable complexity, where our preferred model proposed that participants simulate the social agents' acceptance probability for both the chosen and the unchosen options and compute the expected value difference between the options by integrating these inferred acceptance probabilities with their self-reward magnitudes. We formally define these different models below.

766 According to Model 5, the participant's decision value ( $\Delta \tilde{v}$ ) depends on the difference between the social agent's inferred choice probability ( $\tilde{q}_A$ ) that is associated with the offers on each side  $\{L, R\}$ ,

768 whereby the participant makes decisions only by considering the opponent's acceptance probability (i.e.  
769 choosing the offer which they think is more likely to get accepted):

$$770 \quad \Delta \tilde{v} = \tilde{q}_{A,L}^S - \tilde{q}_{A,R}^S \quad (12)$$

771 where  $S \in \{i, p\}$  defines whether the opponent is individualistic or prosocial.

772 Due to the probabilistic nature of the social decision-making task, we hypothesised that the inferred  
773 acceptance probabilities could also undergo a similar probability weighting transformation as in the non-  
774 social value-based decision-making task (Eq. 6). Therefore, in Model 6, we considered that participants'  
775 decision value ( $\Delta \tilde{v}$ ) may be computed by the following two equations:

$$776 \quad Q_{A,L}^S = 2^{(-(-\log_2(\tilde{q}_{A,L}^S))^{\gamma^S})} \quad (13)$$

$$777 \quad \Delta \tilde{v} = Q_{A,L}^S - Q_{A,R}^S \quad (14)$$

778 where  $\gamma^S > 0$  is a free parameter accounting for the nonlinear modulation of acceptance probabilities  
779 in the social decision-making task, which are estimated separately for each social agent. Here, the  
780 introduction of a free parameter is critical and allows us to evaluate differences between the  
781 modulation of probability weighting in social and non-social contexts.

782 In Model 7, we considered a more sophisticated value computation that also integrates participants'  
783 own payoff ( $R_O$ ). This computation assumes that participants employ a cognitive model with a large  
784 degree of overlap with the previously defined non-social value-based decision-making model (i.e. Model  
785 2), whereby the participant can choose to make an offer with lower  $Q_{A,R-L}^S$  if the overall expected value  
786 is higher.

$$787 \quad \Delta \tilde{v} = (Q_{A,L}^S \cdot R_{O,L}) - (Q_{A,R}^S \cdot R_{O,R}) \quad (15)$$

788 In Model 8, which largely overlaps with the non-social value-based Model 3, the decision value is  
789 computed by the following formula which would account for the participants' risk preferences by  
790 revealing the curvature of their utility functions (25):

$$791 \quad \Delta \tilde{v} = \tilde{q}_{A,L}^S R_{O,L}^\rho - \tilde{q}_{A,R}^S R_{O,R}^\rho \quad (16)$$

792 where  $\rho$  is the power utility parameter, with  $\rho > 1$  indicating a risk-seeking,  $\rho < 1$  indicating a risk-  
 793 averse and  $\rho = 1$  indicating a risk-neutral preference.

794 In Model 9, which largely overlaps with the full non-social value-based Model 4, the decision value is  
 795 computed by the following formula which accounts for both the participants' risk and nonlinear  
 796 probability weighting preferences:

$$797 \quad \Delta\tilde{v} = Q_{A,L}^S R_{O,L}^\rho - Q_{A,R}^S R_{O,R}^\rho \quad (17)$$

798 After each social decision-making experiment, we asked participants to rate how much they considered  
 799 other's acceptance probability, their own payoff, or both on a 0-to-10 scale (e.g. a rating of 5 meaning  
 800 integration with equal weighting; see Fig 3A for self-reported integration weights). In Model 10, we used  
 801 this rating as a linear weighting information, where the weight parameter,  $W$ , takes a value in the  
 802 normalised space (i.e. between 0 to 2) with 0.2 increments because it was directly derived from the  
 803 participants' own report on a 0-to-10 scale (e.g.  $W=1$  indicates integration with equal weighting,  $W=0.4$   
 804 indicates more weight is given to the self-reward magnitude, etc.). In essence, this model is similar to  
 805 non-social value-based Model 1, but with added subjective integration weights. Here, the decision value  
 806 is computed as follows:

$$807 \quad \Delta\tilde{v} = (w\tilde{q}_{A,L}^S \cdot (2-w)R_{O,L}) - (w\tilde{q}_{A,R}^S \cdot (2-w)R_{O,R}) \quad (18)$$

808 Finally, as a baseline control condition, we also investigated the fitness of a model which makes  
 809 decisions based on self-value difference alone (i.e. Model 11;  $\Delta\tilde{v} = R_{O,L} - R_{O,R}$ ).

810 At the very last step, choice probabilities under each model  $M \in \{5, 6, 7, 8, 9, 10, 11\}$  were generated by a  
 811 sigmoid function:

$$812 \quad Q_L^M = 1 / (1 + \exp^{(-\beta_s (\Delta\tilde{v}))}) \quad (19)$$

813 where  $\beta_s > 0$  is the inverse temperature term estimated separately for the social decision-making  
 814 experiments.

815 We used a Maximum Likelihood Estimation procedure to evaluate how well the proposed cognitive  
816 models explained our participants' choice behaviour. The free parameters were estimated using a non-  
817 linear optimization method over a numerical grid which covered the whole parameter space, using  
818 MATLAB's (MathWorks, Inc.) *fmincon* function with random starts.

819 We selected between competing models based on their Bayesian posterior probability weights given the  
820 data (47) by the following formula:

$$821 \quad weight_i = \frac{\exp(-(BIC_i - BIC_{\min}) / 2)}{\sum_k \exp(-(BIC_k - BIC_{\min}) / 2)} \quad (20)$$

822 while considering each model's Bayesian Information Criterion (BIC) value (48), which penalises more  
823 complex models with additional free parameters.

824 For robustness, we also implemented a complementary Bayesian model selection approach (49, 50) by  
825 feeding a matrix (number of participants X number of competing models) of log likelihood values for  
826 each model to the readily available scripts from the SPM12 library (spm\_BMS; [www.fil.ion.ac.uk/spm](http://www.fil.ion.ac.uk/spm))  
827 and computed the exceedance probabilities for each of the competing models.

828

829

830

831

832

833

834

835



## 836 References

- 837 1. Haruno M, Frith CD. Activity in the amygdala elicited by unfair divisions predicts social value  
838 orientation. *Nature neuroscience*. 2010;13(2):160-1.
- 839 2. Murphy RO, Ackermann KA, Handgraaf M. Measuring social value orientation. *Judgment and*  
840 *decision making*. 2011;6(8):771-81.
- 841 3. Sanfey AG, Rilling JK, Aronson JA, Nystrom LE, Cohen JD. The neural basis of economic decision-  
842 making in the ultimatum game. *Science*. 2003;300(5626):1755-8.
- 843 4. Fehr E, Schmidt KM. A theory of fairness, competition, and cooperation. *Quarterly journal of*  
844 *Economics*. 1999:817-68.
- 845 5. Axelrod RM. *The complexity of cooperation: Agent-based models of competition and*  
846 *collaboration*: Princeton University Press; 1997.
- 847 6. Kahneman D, Tversky A. Prospect theory: An analysis of decision under risk. *Econometrica*:  
848 *Journal of the Econometric Society*. 1979:263-91.
- 849 7. Press WH, Dyson FJ. Iterated Prisoner's Dilemma contains strategies that dominate any  
850 evolutionary opponent. *Proceedings of the National Academy of Sciences*. 2012;109(26):10409-13.
- 851 8. Lejuez CW, Read JP, Kahler CW, Richards JB, Ramsey SE, Stuart GL, et al. Evaluation of a  
852 behavioral measure of risk taking: the Balloon Analogue Risk Task (BART). *Journal of Experimental*  
853 *Psychology: Applied*. 2002;8(2):75.
- 854 9. Stott HP. Cumulative prospect theory's functional menagerie. *Journal of Risk and uncertainty*.  
855 2006;32(2):101-30.
- 856 10. McFadden D. *Conditional logit analysis of qualitative choice behavior*. 1973.
- 857 11. McFadden D. *Quantitative methods for analyzing travel behavior of individuals: some recent*  
858 *developments*: Institute of Transportation Studies, University of California; 1977.
- 859 12. Whelan R. Effective analysis of reaction time data. *The Psychological Record*. 2008;58(3):475.
- 860 13. Box GE, Cox DR. An analysis of transformations. *Journal of the Royal Statistical Society Series B*  
861 *(Methodological)*. 1964:211-52.
- 862 14. Tversky A, Fox CR. Weighing risk and uncertainty. *Psychological review*. 1995;102(2):269.
- 863 15. Hsu M, Krajbich I, Zhao C, Camerer CF. Neural response to reward anticipation under risk is  
864 nonlinear in probabilities. *The Journal of Neuroscience*. 2009;29(7):2231-7.
- 865 16. Wu G, Gonzalez R. Common consequence conditions in decision making under risk. *Journal of*  
866 *Risk and uncertainty*. 1998;16(1):115-39.
- 867 17. Schonberg T, Fox CR, Poldrack RA. Mind the gap: bridging economic and naturalistic risk-taking  
868 with cognitive neuroscience. *Trends in Cognitive Sciences*. 2011;15(1):11-9.
- 869 18. Hsu M, Bhatt M, Adolphs R, Tranel D, Camerer CF. Neural systems responding to degrees of  
870 uncertainty in human decision-making. *Science*. 2005;310(5754):1680-3.
- 871 19. Samanez-Larkin GR, Wagner AD, Knutson B. Expected value information improves financial risk  
872 taking across the adult life span. *Social Cognitive and Affective Neuroscience*. 2010:nsq043.
- 873 20. Hunt LT, Kolling N, Soltani A, Woolrich MW, Rushworth MF, Behrens TE. Mechanisms underlying  
874 cortical activity during value-guided choice. *Nature neuroscience*. 2012;15(3):470-6.
- 875 21. Yoshida W, Dolan RJ, Friston KJ. Game theory of mind. *PLoS computational biology*.  
876 2008;4(12):e1000254.
- 877 22. Hayden BY, Heilbronner SR. All that glitters is not reward signal. *Nature neuroscience*.  
878 2014;17(9):1142-4.
- 879 23. Nicolle A, Klein-Flügge MC, Hunt LT, Vlaev I, Dolan RJ, Behrens TE. An agent independent axis for  
880 executed and modeled choice in medial prefrontal cortex. *Neuron*. 2012;75(6):1114-21.
- 881 24. Chung D, Christopoulos GI, King-Casas B, Ball SB, Chiu PH. Social signals of safety and risk confer  
882 utility and have asymmetric effects on observers' choices. *Nature neuroscience*. 2015;18(6):912-6.

- 883 25. Suzuki S, Jensen EL, Bossaerts P, O'Doherty JP. Behavioral contagion during learning about  
884 another agent's risk-preferences acts on the neural representation of decision-risk. *Proceedings of the*  
885 *National Academy of Sciences*. 2016;201600092.
- 886 26. Lauharatanahirun N, Christopoulos GI, King-Casas B. Neural computations underlying social risk  
887 sensitivity. *Frontiers in human neuroscience*. 2012;6:213.
- 888 27. Van Lange PA. The pursuit of joint outcomes and equality in outcomes: An integrative model of  
889 social value orientation. *Journal of personality and social psychology*. 1999;77(2):337.
- 890 28. de Quervain DJ-F, Fischbacher U, Treyer V, Schellhammer M, Schnyder U, Buck A, et al. The  
891 Neural Basis of Altruistic Punishment. *Science*. 2004;305(5688):1254-8.
- 892 29. Pulcu E, Thomas E, Trotter P, McFarquhar M, Juhasz G, Sahakian B, et al. Social-economical  
893 decision making in current and remitted major depression. *Psychological Medicine*. 2014;1-13.
- 894 30. Xiang T, Lohrenz T, Montague PR. Computational substrates of norms and their violations during  
895 social exchange. *The Journal of Neuroscience*. 2013;33(3):1099-108.
- 896 31. Knoch D, Pascual-Leone A, Meyer K, Treyer V, Fehr E. Diminishing Reciprocal Fairness by  
897 Disrupting the Right Prefrontal Cortex. *Science*. 2006;314(5800):829-32.
- 898 32. Koenigs M, Tranel D. Irrational economic decision-making after ventromedial prefrontal  
899 damage: Evidence from the ultimatum game. *Journal of Neuroscience*. 2007;27(4):951-6.
- 900 33. Haruno M, Kimura M, Frith CD. Activity in the nucleus accumbens and amygdala underlies  
901 individual differences in prosocial and individualistic economic choices. *Journal of Cognitive*  
902 *Neuroscience*. 2014;26(8):1861-70.
- 903 34. Fischbacher U. z-Tree: Zurich toolbox for ready-made economic experiments. *Experimental*  
904 *economics*. 2007;10(2):171-8.
- 905 35. Babiloni F, Astolfi L. Social neuroscience and hyperscanning techniques: past, present and  
906 future. *Neuroscience & Biobehavioral Reviews*. 2014;44:76-93.
- 907 36. Van Lange PA, De Bruin E, Otten W, Joireman JA. Development of prosocial, individualistic, and  
908 competitive orientations: theory and preliminary evidence. *Journal of personality and social psychology*.  
909 1997;73(4):733.
- 910 37. Campbell-Meiklejohn DK, Bach DR, Roepstorff A, Dolan RJ, Frith CD. How the opinion of others  
911 affects our valuation of objects. *Current Biology*. 2010;20(13):1165-70.
- 912 38. Daw ND. Trial-by-trial data analysis using computational models. *Decision making, affect, and*  
913 *learning: Attention and performance XXIII*. 2011;23:1.
- 914 39. Hampton AN, Bossaerts P, O'Doherty JP. Neural correlates of mentalizing-related computations  
915 during strategic interactions in humans. *Proceedings of the National Academy of Sciences*.  
916 2008;105(18):6741-6.
- 917 40. Behrens TE, Hunt LT, Woolrich MW, Rushworth MF. Associative learning of social value. *Nature*.  
918 2008;456(7219):245-9.
- 919 41. Janssen M, Ahn T-K. Learning, signaling, and social preferences in public-good games. *Ecology*  
920 *and society*. 2006;11(2).
- 921 42. Erev I, Roth AE. Predicting how people play games: Reinforcement learning in experimental  
922 games with unique, mixed strategy equilibria. *American economic review*. 1998:848-81.
- 923 43. Suzuki S, Harasawa N, Ueno K, Gardner JL, Ichinohe N, Haruno M, et al. Learning to simulate  
924 others' decisions. *Neuron*. 2012;74(6):1125-37.
- 925 44. Rescorla RA, Wagner AR. A theory of Pavlovian conditioning: Variations in the effectiveness of  
926 reinforcement and nonreinforcement. *Classical conditioning II: Current research and theory*. 1972;2:64-  
927 99.
- 928 45. Prelec D. The probability weighting function. *Econometrica*. 1998:497-527.
- 929 46. Behrens TE, Woolrich MW, Walton ME, Rushworth MF. Learning the value of information in an  
930 uncertain world. *Nature neuroscience*. 2007;10(9):1214-21.

- 931 47. Burnham KP, Anderson DR. Multimodel inference understanding AIC and BIC in model selection.  
932 Sociological methods & research. 2004;33(2):261-304.
- 933 48. Burnham KP, Anderson DR. Model selection and multimodel inference: a practical information-  
934 theoretic approach: Springer Science & Business Media; 2003.
- 935 49. Stephan KE, Penny WD, Daunizeau J, Moran RJ, Friston KJ. Bayesian model selection for group  
936 studies. Neuroimage. 2009;46(4):1004-17.
- 937 50. Rigoux L, Stephan KE, Friston KJ, Daunizeau J. Bayesian model selection for group studies—  
938 revisited. Neuroimage. 2014;84:971-85.

939

940

941

942

943

944

945

946

947

948

949

950

951

952

953

954

955

956

957 **Supplementary Figures and Legends:**

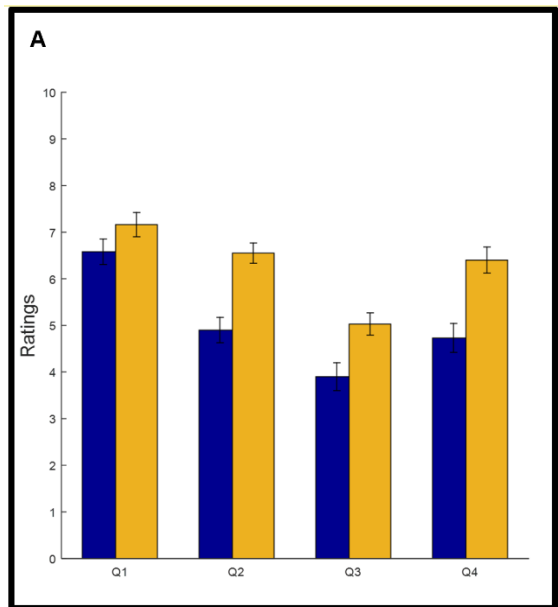

958

959 **Fig. S1. Descriptive ratings participants made about social agents following the observational social-**  
960 **learning sessions. (A) Participants responded to a number of questions while thinking about the**  
961 **personality of these social agents (all rated on a Likert scale from 0 to 10).**

962 **Q1: How much do you think this person cares about rewards to others?**

963 **Q2: How much would you like this person if you spent 1 hour with him/her in real life?**

964 **Q3: How many people do you know in real life who resemble this person?**

965 **Q4: How socially close do you feel towards those people that you know?**

966 **A fitted 4x2 MANOVA suggests there is a significant main effect of the social agent ( $F=3.01$ ,  $P=0.03$ )**

967 **and a significant effect of the interaction term ( $F=10.16$ ,  $P<0.001$ ).**

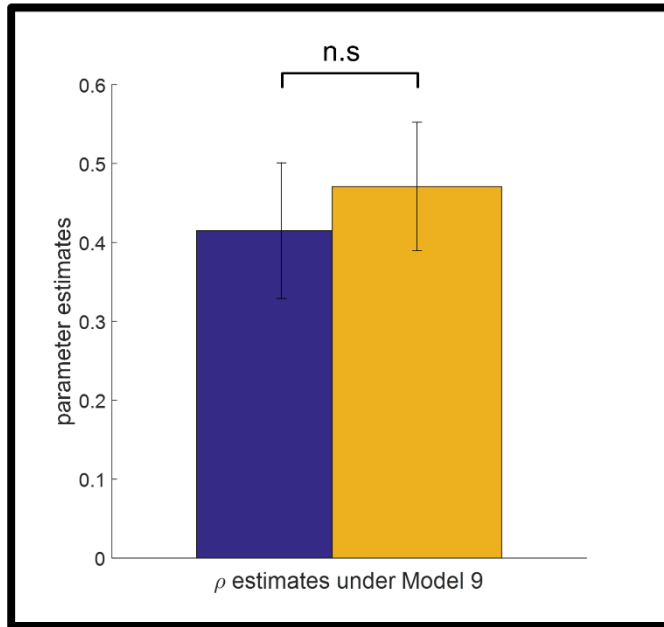

968

969 **Fig. S2. Risk parameters ( $\rho_i^p$ ) estimated from the Ultimatum giving experiments against two**  
970 **different social agents with different SVOs were not significantly different (P=0.64, n.s: not significant).**

971

972

973

974

975

976

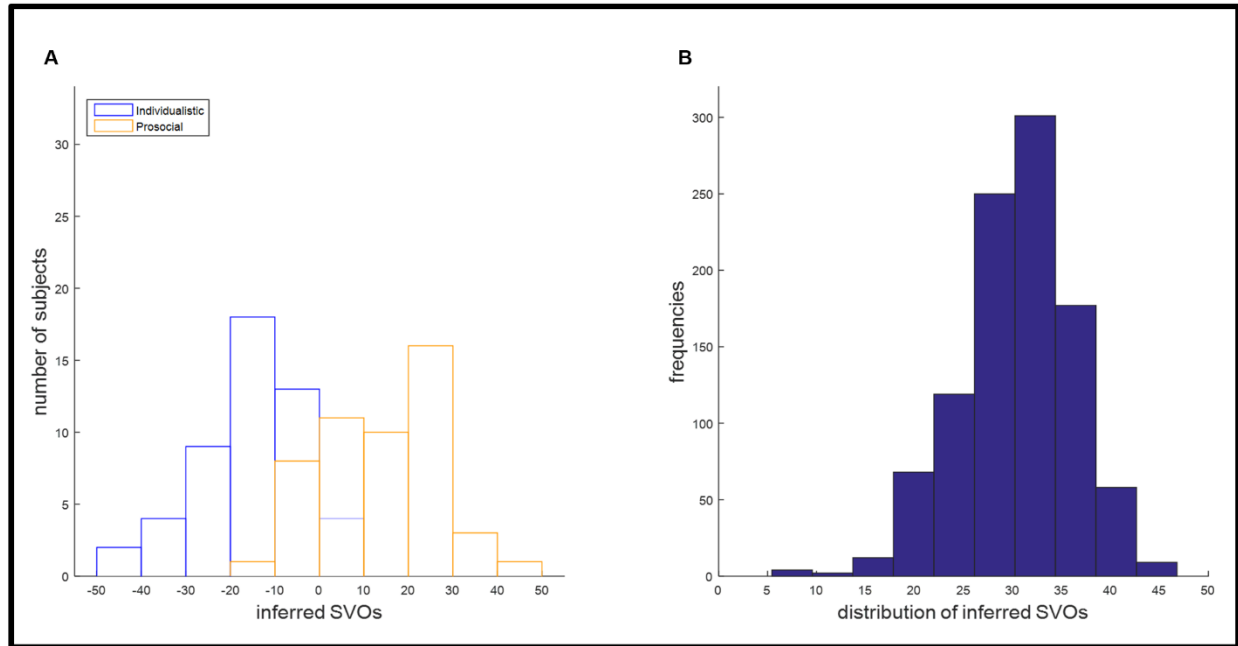

977

978 **Fig. S3. Distributions of opponents' inferred SVOs ( $S\tilde{V}O$ ) based on simulations of the encoded value**  
979 **functions ( $\tilde{q}_A$ ) from the social-learning sessions. (A) The distribution of inferred SVOs for the whole**  
980 **cohort (i.e. distribution of means obtained from each subject's simulation) based on 1000 simulations**  
981 **of the encoded value functions per participant per social agent (i.e. prosocial and individualistic).**  
982 **These distributions were significantly different from each other ( $D=0.78$ ,  $P<0.001$ ), suggesting that**  
983 **participants were able to make distinct inferences about the SVOs of their opponents. (B) The**  
984 **distribution of inferred SVOs in 1000 simulations from a single subject gives a normal distribution of**  
985 **inferred SVOs, of which the mean and the standard deviation were used as input variables for the**  
986 **multiple linear regression analysis. Here, the true SVO of the prosocial agent was  $31.5^\circ$ , which falls**  
987 **close to the mean of this distribution ( $\mu = 30.77^\circ \pm 5.4$ ).**

988

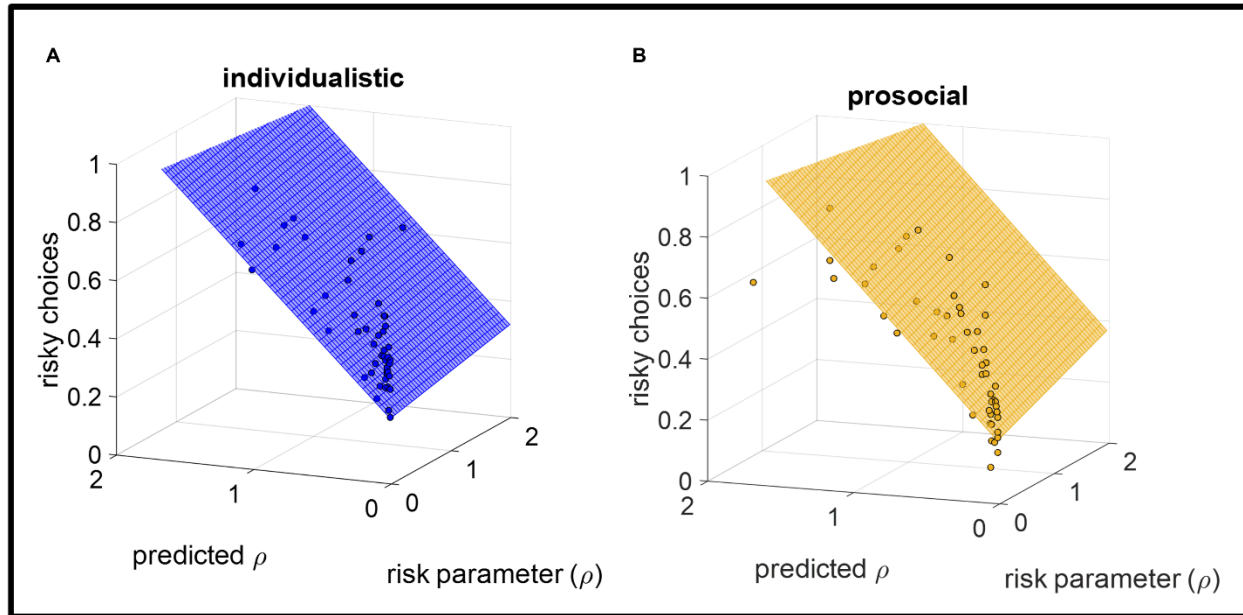

989

990 **Fig. S4. A 3D scatter plot with fitted planes through the least squares regression lines, summarises the**  
991 **relationship between the participants' normalised frequency of choosing risky options (i.e. the vertical**  
992 **axes in both A and B; identical to Fig. 4A), the estimated risk parameters in the Ultimatum giving**  
993 **experiments and the predictions of the multiple linear regression model. Predicted values of the risk**  
994 **parameter ( $\rho$ ) in the Ultimatum giving experiments correlated significantly with the actual**  
995 **parameter estimates and the participants' choice frequency ( $r>.383$ ,  $p<.006$ , Bonferroni corrected).**

996

997

998

999

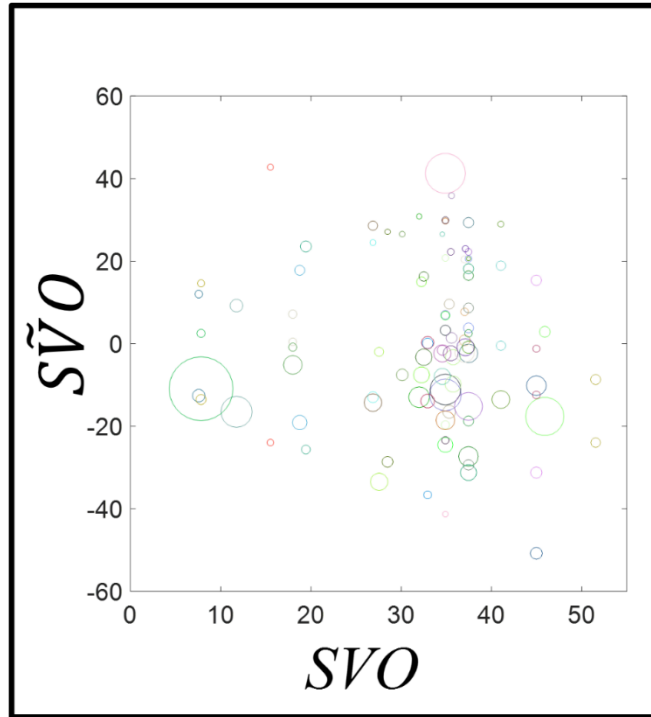

1000

1001 **Fig. S5. Combinations of social interactions covered by the current study (n=100) with respect to the**  
1002 **participants' own (x-axis) and their inference of their opponents' SVO (y-axis). Markers with the same**  
1003 **[R, G, B] colour coding refer to a single subject's data point. Marker sizes are proportional to the**  
1004 **uncertainty estimates ( $\tilde{SVO}_o$ ), which was included as an input variable in the multiple linear**  
1005 **regression model described in the main text.**

1006

1007

1008

1009

1010

1011

1012



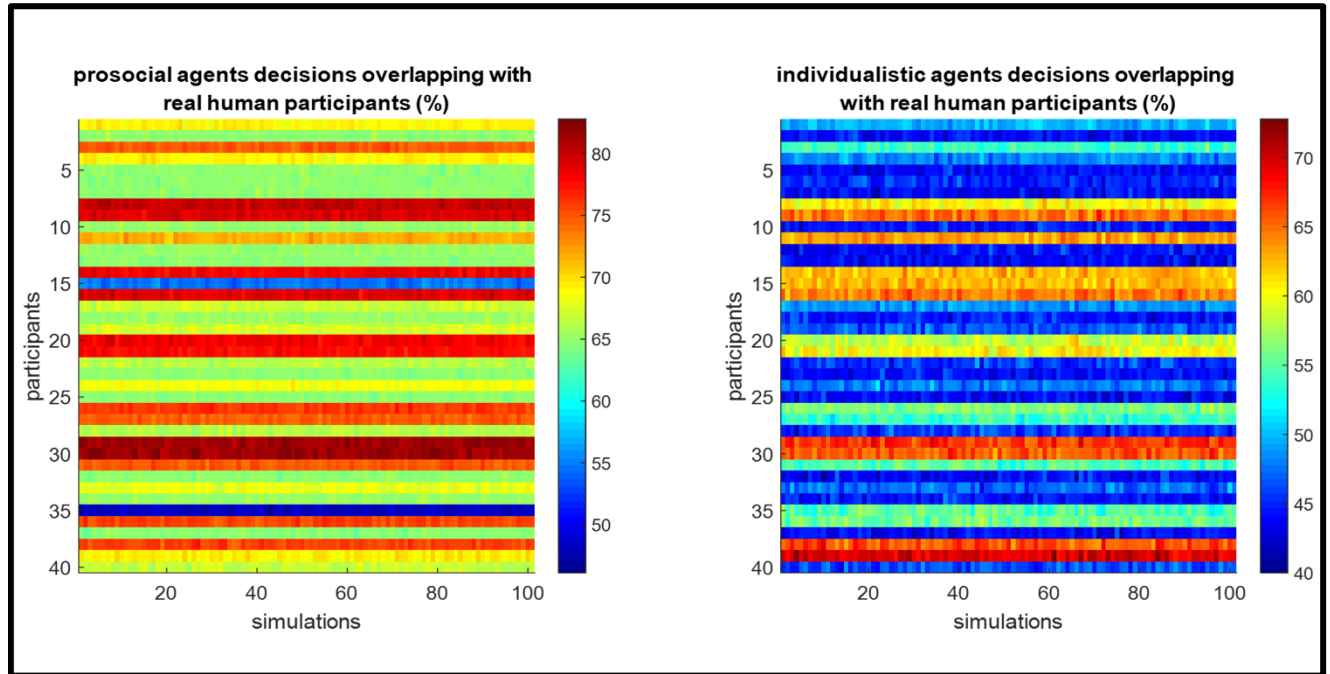

1013

1014 **Fig S6. Summary results of a control experiment conducted in an independent cohort (n=40). Colour**  
1015 **bar shows the percentage of choices overlapping between the prosocial agent and human participants**  
1016 **responding to Ultimatum offers (left panel), and the individualistic agent and human participants**  
1017 **(right panel). The decisions of the computerised agents were simulated 100 times for each participant,**  
1018 **and the percentage overlap was calculated accordingly. Considering that expected value difference**  
1019 **(~0 range) was covered with an adequate number of trials across all experiments reported in this**  
1020 **manuscript, where the choice behaviour is stochastic, these results provide additional support to the**  
1021 **subjective ratings reported in Fig. S3 (responses to Q3) that indicate the behaviour of the**  
1022 **computerised agents should be well tolerated by the participants in the main experiment.**

1023

1024

1025

1026

1027

1028

1029

1030

1031

1032 <https://youtu.be/pMC9H9vV9Fs>

1033 **Bayesian Ideal Observer model can track social agents' Ultimatum acceptance probabilities optimally**  
1034 **by updating the estimated means of the nested beta distributions over a numerical grid of self and**  
1035 **other's reward magnitudes.**
